1 **TPL2 kinase activity regulates microglial inflammatory responses and promotes**  
2 **neurodegeneration in tauopathy mice**

3

4

5 Yuanyuan Wang<sup>1,\*</sup>, Tiffany Wu<sup>1</sup>, Ming-Chi Tsai<sup>1</sup>, Mitchell G Rezzonico<sup>2</sup>, Alyaa M Abdel-  
6 Haleem<sup>3</sup>, Luke Xie<sup>4</sup>, Vineela D Gandham<sup>4</sup>, Hai Ngu<sup>5</sup>, Kimberly Stark<sup>1</sup>, Caspar Glock<sup>2</sup>,  
7 Daqi Xu<sup>6</sup>, Oded Foreman<sup>5</sup>, Brad A Friedman<sup>2</sup>, Morgan Sheng<sup>1,7</sup>, Jesse E Hanson<sup>1,\*</sup>

8

9

10 <sup>1</sup>Department of Neuroscience, Genentech Inc.; South San Francisco, CA 94080, USA.

11 <sup>2</sup>Department of OMNI Bioinformatics, Genentech Inc.; South San Francisco, CA 94080,  
12 USA.

13 <sup>3</sup>Computational Science & Exploratory Analytics, Roche IT, Hoffmann-La Roche  
14 Limited; Mississauga, ON L5N 5M8, Canada.

15 <sup>4</sup>Department of Biomedical Imaging, Genentech Inc.; South San Francisco, CA 94080,  
16 USA.

17 <sup>5</sup>Department of Pathology, Genentech Inc.; South San Francisco, CA 94080, USA.

18 <sup>6</sup>Department of Immunology, Genentech Inc.; South San Francisco, CA 94080, USA.

19 <sup>7</sup>Stanley Center for Psychiatric Research, Broad Institute of MIT and Harvard; Cambridge,  
20 MA 02142, USA.

21 \*Correspondence: wang.yuanyuan@gene.com, [hanson.jesse@gene.com](mailto:hanson.jesse@gene.com)

22

23

24

25

26

27

28

29

30

31

## 32 **Abstract**

33 TPL2 (MAP3K8) is a central signaling node in the inflammatory response of peripheral immune  
34 cells. We find that TPL2 kinase activity modulates microglial cytokine release and is required for  
35 microglia-mediated neuron death *in vitro*. In acute *in vivo* neuroinflammation settings, TPL2  
36 kinase activity regulates microglia activation states and brain cytokine levels. In a tauopathy model  
37 of chronic neurodegeneration, loss of TPL2 kinase activity reduces neuroinflammation and rescues  
38 synapse loss, brain volume loss, and behavioral deficits. Single-cell RNAseq analysis indicates  
39 protection in the tauopathy model was associated with reductions in activated microglia  
40 subpopulations as well as infiltrating peripheral immune cells. Overall, using various models, we  
41 find that TPL2 kinase activity can promote multiple harmful consequences of microglial activation  
42 in the brain including cytokine release, iNOS induction, astrocyte activation, and immune cell  
43 infiltration. Consequently, inhibiting TPL2 kinase activity could represent a potential therapeutic  
44 strategy in neurodegenerative conditions.

45

## 46 **Introduction**

47 Activation of microglia, the tissue resident macrophages of the brain, occurs in numerous  
48 neurodegenerative conditions including Alzheimer's disease (AD) and frontotemporal dementia  
49 (FTD), where microglia are activated in response to amyloid and tau pathology. While microglia  
50 activation may facilitate beneficial functions, such as clearance of amyloid plaques, in the early  
51 stages of AD, chronic microglia activation could contribute to disease progression via cytokine  
52 release and other harmful functions during later stages of disease (Bright et al., 2019; Hansen et al.,  
53 2018; Leng and Edison, 2021). A pathogenic role for inflammatory cytokines in neurodegeneration  
54 is supported by the increased risk for AD in people with rheumatoid arthritis (RA), psoriasis, and  
55 other inflammatory diseases, and a significantly reduced incidence of AD for those patients that  
56 received treatment with TNF blocking agents (Zhou et al., 2020). Several aspects of  
57 neuroinflammation that have been observed in neurodegeneration patient brains have been studied  
58 in preclinical models and found to have deleterious effects. This includes studies in AD and FTD  
59 models that identify harmful effects of activated astrocytes (Liddel et al., 2017), NLRP3  
60 inflammasome activation (Heneka et al., 2013; Ising et al., 2019), complement pathway activation  
61 (Dejanovic et al., 2018; Hong et al., 2016; Wu et al., 2019), and infiltration of T cells (Gate et al.,  
62 2020; Laurent et al., 2017; Merlini et al., 2018).

63 Given such diverse mediators of the detrimental effects of neuroinflammation and  
64 microglia activation, targeting a central regulator of inflammatory function represents an attractive  
65 therapeutic approach. We therefore focused on tumor progression locus 2 (TPL2), a kinase that is

66 expressed in both adaptive and innate immune cells in the peripheral system and plays central roles  
67 in regulating inflammatory responses. TPL2 is a mitogen-activated protein kinase kinase kinase  
68 (MAP3K) downstream of TNFR, IL1R and Toll like receptors. It is maintained in an inactive  
69 complex with ABIN-2 (A20-binding inhibitor of NF- $\kappa$ B 2) and p105, and is released upon  
70 activation. TPL2 activation is a critical node of the inflammatory response with activation leading  
71 to changes in inflammatory gene transcripts via ERK1/2 and p38 activation, resulting in  
72 amplification of inflammatory responses in peripheral immune cells (Xu et al., 2018). Preclinical  
73 studies using genetic manipulation of TPL2 in mice have found that TPL2 deficiency provides  
74 beneficial effects in multiple inflammatory disease models, such as inflammatory bowel disease  
75 (IBD), Psoriasis, Pancreatitis and Multiple sclerosis (Senger et al., 2017; Sriskantharajah et al.,  
76 2014; Xiao et al., 2014; Xu *et al.*, 2018), and TPL2 is being pursued as a target for treating  
77 inflammatory conditions including RA and psoriasis (Zarrin et al., 2021).

78 To evaluate a potential role for TPL2 kinase activity in microglia during  
79 neuroinflammation, we used TPL2 inhibitors and TPL2 kinase dead (TPL2-KD) mice (D270A  
80 mutation). TPL2-KD mice were chosen instead of TPL2 knockout (KO) mice because TPL2 is  
81 required to maintain stable expression of its interacting partner ABIN-2 and TPL2 KO mice have  
82 dramatically reduced ABIN-2 levels, which could confound interpretations regarding the role of  
83 TPL2 kinase activity (Sriskantharajah *et al.*, 2014; Webb et al., 2019). We first examined the  
84 function of TPL2 in microglial inflammation using *in vitro* models, then in acute  
85 neuroinflammation settings, and finally in a tauopathy model of chronic neurodegeneration. These  
86 experiments indicate that TPL2 regulates microglia inflammatory activity and damage to neurons,  
87 and that blocking TPL2 function can be neuroprotective. Measurement of the cellular changes that  
88 occurred in the brains of the tauopathy mouse model with TPL2-KD along with reduced  
89 neurodegeneration and normalization of behavior reveal multiple potential beneficial aspects of  
90 preventing TPL2 kinase activity.

91

## 92 **Results**

93

### 94 **TPL2 modulates inflammatory responses of microglia**

95 TPL2 is expressed in both innate and adaptive immune cells in the peripheral immune system to  
96 regulate inflammatory responses (Xu *et al.*, 2018). To examine the expression of TPL2 in the brain  
97 under resting and disease conditions, we analyzed published datasets as well as datasets we recently  
98 generated. RNA-seq analysis of FACS purified cells from human (Srinivasan et al., 2020) and  
99 mouse (Zhang et al., 2014) cortex revealed that TPL2 expression is enriched in brain myeloid cells

100 (supplementary Fig. S1A). In an acute neuroinflammation study, in which mice received  
101 intraperitoneal injection of the endotoxin lipopolysaccharide (LPS), TPL2 expression was highly  
102 induced in both bulk brain tissue (GSE196401) and sorted microglia (Srinivasan et al., 2016). We  
103 also found that TPL2 gene expression was upregulated in bulk tissue (GSE186414) and sorted  
104 microglia from the P301S Tauopathy mouse model (Friedman et al., 2018) (supplementary Fig.  
105 S1B). Western blot analysis of TPL2 protein levels in the cortex of Alzheimer's disease (AD)  
106 patients showed an increase compared to healthy control brains (supplementary Fig. S1C).

107 We first used mouse primary microglia cultures to investigate the TPL2 signaling cascade  
108 in this brain cell type. Upon LPS stimulation, phosphorylation of ERK and p38 was dramatically  
109 increased, and this increased phosphorylation was significantly dampened in the presence of the  
110 TPL2 small molecule inhibitors G-767 and G-432 (Fig. 1A,B; supplementary Fig. S2A). In  
111 contrast, as expected, LPS-induced nuclear factor-kappa B (NF- $\kappa$ B) pathway activation, as  
112 measured by elevation of phospho-p65, was not affected by TPL2 inhibition. Of note, the TPL2  
113 inhibitors did not affect baseline phosphorylation of ERK, p38 or p65 without stimulation (Fig.  
114 1A,B). These results are consistent with TPL2 mediating mitogen-activated protein kinase (MAPK)  
115 signaling, but not NF- $\kappa$ B signaling, in microglia. It is well established that TPL2 plays an important  
116 role in regulating cytokine production by myeloid cells in the peripheral immune system via the  
117 MAPK signaling pathway (Arthur and Ley, 2013). Consistently, using multiplex immunoassays to  
118 measure cytokine release by microglia, we found that LPS induced production of inflammatory  
119 cytokines, such as TNF $\alpha$ , IL-1 $\alpha$ , IL-6 and CXCL1, was greatly reduced in the presence of TPL2  
120 inhibitors (Fig. 1C and supplementary Fig. S2B, S3A). Moreover, when we analyzed cytokine  
121 release by microglia cultured from TPL2 kinase dead (KD) mice, there was dramatically decreased  
122 LPS-induced cytokine production (Fig. 1D and supplementary Fig. S3B). Overall, this data  
123 indicates that TPL2 is a key regulator of the microglial MAPK signaling pathway and  
124 proinflammatory cytokine responses, and thus could play an important role in modulating  
125 neuroinflammation in the brain.

126

### 127 **Inhibition of TPL2 kinase activity protects against neuronal death in a co-culture model**

128 Activated microglia can be neurotoxic by releasing factors such as proinflammatory cytokines and  
129 reactive oxygen species (ROS) (Glass et al., 2010; Wang et al., 2015). Since we found that TPL2  
130 can modulate proinflammatory responses in microglia, we next examined if targeting TPL2 could  
131 dampen neurotoxic functions of activated microglia. To investigate this, we used an *in vitro*  
132 microglia and neuron co-culture system and tested pharmacological and genetic inhibition of TPL2  
133 kinase activity. Stimulation of microglia and neuron co-cultures with LPS + interferon gamma

134 (IFN $\gamma$ ), a stimulus reported to induce strong microglia activation (Straccia et al., 2011), resulted in  
135 almost complete neuronal loss as measured by MAP2 immunostaining (Fig. 2A,B). Strikingly,  
136 when the TPL2 inhibitor G-767 was added to the co-culture, the neuronal loss induced by the LPS  
137 + IFN $\gamma$  stimulation was nearly fully rescued. In addition, when WT neurons were co-cultured with  
138 microglia isolated from TPL2-KD mice, stimulation-induced neuronal loss was also rescued (Fig.  
139 2A,B). Of note, when neurons were cultured alone and stimulated with LPS + IFN $\gamma$  or co-cultured  
140 with microglia at 1:1 ratio without stimulation, no obvious neuronal loss was observed  
141 (supplementary Fig. S4).

142 We next wanted to understand the mechanism of neuronal death and the neuroprotective  
143 effect of TPL2 kinase inhibition in this co-culture system. Several groups have shown that LPS +  
144 IFN $\gamma$  stimulation can induce dramatic increases of inducible nitric oxide synthase (iNOS)  
145 expression in microglia and subsequent release of nitric oxide (NO), which is neurotoxic  
146 (Papageorgiou et al., 2016; Sheng et al., 2011; Straccia *et al.*, 2011). Consistent with this  
147 mechanism, we found that when primary microglia cultures were stimulated with LPS + IFN $\gamma$ ,  
148 iNOS protein levels were increased and accumulated over time (Fig. 2C,D). TPL2 small molecule  
149 inhibition significantly reduced iNOS protein in stimulated microglia (50% reduction) and  
150 stimulated microglia isolated from TPL2-KD mice also showed a dramatic reduction of iNOS (85%  
151 reduction) (Fig. 2C-E). To determine if NO plays a role in neuronal death in the co-cultures, we  
152 utilized the iNOS inhibitor 1400W. Treatment with the iNOS inhibitor almost fully rescued the  
153 neuronal loss (Fig. 2F,G), indicating that NO production by activated microglia is a key contributor  
154 to neuronal death in this co-culture system.

155

### 156 **TPL2 reduces acute neuroinflammation in an *in vivo* LPS injection model**

157 We next examined the role of TPL2 *in vivo* using an acute neuroinflammation model. We injected  
158 WT or TPL2-KD mice with either PBS or LPS (10 mg/kg i.p.) and collected brain tissue 24 hours  
159 later for bulk RNA-seq analysis. Using previously defined CNS myeloid gene modules (Friedman  
160 *et al.*, 2018), we found that LPS induced significantly increased expression of disease associated  
161 microglia (DAM) genes (e.g., *Il1r1*, *Axl*) in WT mice, whereas this microglia activation response  
162 was attenuated in LPS treated TPL2-KD mice (Fig. 3A,D,E). Homeostatic microglia gene  
163 expression (e.g., *Tmem119*, *Cx3cr1*) was downregulated by LPS in WT mice, but relatively  
164 unchanged in LPS treated TPL2-KD mice (Fig. 3C,D,E), consistent with TPL2-KD microglia being  
165 in a less activated state after stimulation. Interestingly, an increase in microglia proliferation genes  
166 by LPS in WT mice was also normalized in TPL2-KD mice (Fig 3E).

167 In addition to directly affecting neurons, microglia have also been shown to indirectly  
168 cause neurotoxicity by activating astrocytes. Cytokines released by microglia in response to LPS  
169 stimulation can induce the transition of astrocytes from a resting state to an activated/reactive state  
170 that can be neurotoxic (Liddelow *et al.*, 2017). Consistent with a reduction of microglia activation  
171 of astrocytes, LPS-induced activated astrocyte gene expression (e.g., *Cd44*, *Srgn*) was also  
172 attenuated in TPL2-KD mice (Fig. 3B,D,E). In parallel to the RNAseq measurements, we also  
173 measured brain cytokine levels and found that several cytokines such as IL-1 $\alpha$ , IL-6, and CXCL1  
174 that were elevated in LPS treated WT mouse brains, had significantly lower levels in TPL2-KD  
175 mouse brains (Fig. 3F). Collectively, these results indicate TPL2 plays a key role in microglia and  
176 astrocyte activation *in vivo*, and show that acute neuroinflammation can be reduced by ablation of  
177 TPL2 kinase activation.

178 We next investigated if TPL2 kinase deficiency could protect against neuronal damage in  
179 acute injury models. We first tested the mouse optic nerve crush (ONC) model. However, although  
180 we observed moderate reduction of microgliosis in TPL2-KD mice after ONC, we did not see  
181 rescue of retinal ganglion cell loss, (supplementary Fig. S5A). Additionally, we also investigated  
182 the role of TPL2 in another acute model, the rat transient middle cerebral artery occlusion (tMCAO)  
183 model of stroke. Similarly, despite significantly reduced microgliosis, we did not see beneficial  
184 effects in TPL2-KD rats in terms of body weight loss, behavioral deficits and lesion volume  
185 measured by MRI after tMCAO (supplementary Fig. S5B-H). These results highlight that reduced  
186 neuroinflammation with TPL2KD may not be sufficient for neuroprotection in cases of severe acute  
187 tissue damage.

188

### 189 **Neuroinflammation in TauP301S tauopathy model is attenuated in TPL2-KD mice**

190 To determine if TPL2 contributes to neuroinflammation and neurodegeneration in a chronic disease  
191 setting, we crossed TPL2-KD mice with TauP301S tauopathy mice. These transgenic mice  
192 overexpress human mutant Tau and develop pathology marked by phosphoTau accumulation,  
193 neuroinflammation and brain atrophy as the mice age, especially in the hippocampus (Wu *et al.*,  
194 2019; Yoshiyama *et al.*, 2007). We examined astrogliosis and microgliosis by analyzing the  
195 microglia marker Iba1 and the astrocyte marker GFAP in 9-month-old male mice and 11-month-  
196 old female mice, as female mice develop the Tau pathology slower compared with the male mice  
197 in this mouse line based on our previous experience (Wu *et al.*, 2019). TPL2KD did not affect the  
198 % area of the brain covered by Iba1 or GFAP in non-transgenic mice. In TauP301S mice, the Iba1  
199 and GFAP signals were greatly increased reflecting gliosis, and TPL2 kinase deficiency slightly  
200 ameliorated this gliosis (Fig. 4A,B). The effect was observed with either whole brain section

201 analysis or hippocampal region analysis. Interestingly, phospho-Tau pathology (measured by AT8  
202 staining) was also somewhat reduced in TauP301S;TPL2KD mice (Fig. 4A,B), potentially  
203 reflecting the interplay between neuroinflammation and Tau pathology (Didonna, 2020; Maphis et  
204 al., 2015). Consistent with the gliosis changes, the levels of several cytokines and chemokines that  
205 were significantly increased in TauP301S mouse brains were blunted in TauP301S;TPL2KD  
206 brains, including CXCL9, CXCL10, IL6 and IFN $\gamma$  (Fig. 4C).

207

### 208 **Single-cell RNA-seq analysis reveals reduced peripheral immune cell infiltration in** 209 **P301S;TPL2KD mice**

210 To gain further insight into the effect of TPL2-KD in the P301S brain, we performed single-cell  
211 RNA sequencing of the hippocampus, a brain region where pathology is most prominent in the  
212 TauP301S model. Dimensional reduction by Seurat clustering and interpretation of clusters using  
213 previously established gene sets (Friedman *et al.*, 2018; Lee et al., 2021b; Zeisel et al., 2018)  
214 resulted in annotation of 13 cell types (Fig. 5A, supplementary Fig. S6, Table S1). To investigate  
215 how Tau pathology and TPL2 kinase activity affected the relative abundance of various cell types,  
216 we examined cellularity across genotypes (Fig S7). P301S mice showed increases in relative  
217 abundance of several cell types (supplementary Fig. S6B, S7), including microglia, T cells, and a  
218 cluster we initially labeled as “mixed immune cells” (Fig. 5A, and supplementary Fig. S7). Further  
219 analysis of the mixed immune cells cluster showed that it contained a unique cell type with  
220 expression of distinct genes compared to microglia or T cells (e.g. *Pibdl1*, *Mgl2*, *Clec9a*)  
221 (supplementary Fig. S8A). Subclustering of the mixed immune cells identified this unique cell  
222 type as a distinct cluster from microglia or T cells (supplementary Fig. S8), and mapping onto  
223 ImmGen cell type data (Heng et al., 2008) revealed this population corresponded to dendritic cells  
224 (supplementary Fig. S8). Like microglia and T cells, dendritic cells also showed an elevation in  
225 P301S brains (Fig. 5C; supplementary Fig. S9). Strikingly, while TPL2KD did not have a  
226 significant effect on the proportion of any of the 13 cell types in non-transgenic mice, and did not  
227 alter the proportion of most cell types in P301S brains, TPL2KD significantly reduced the  
228 abundance of T cells and dendritic cells in P301S brains (Fig. 5B,C; supplementary Fig. S9). This  
229 indicates P301S;TPL2KD mice have reduced infiltration of peripheral immune cells compared to  
230 P301S mice. Given the presence of T cells in the brains of human AD patients and preclinical  
231 disease models, and the beneficial effects of T cell depletion in mouse disease or injury models  
232 (Gate *et al.*, 2020; Laurent *et al.*, 2017; Merlini *et al.*, 2018; Togo et al., 2002), the decreased  
233 presence of peripheral immune cells in TauP301SxTPL2KD mouse brains could have beneficial  
234 effects.

235 Subclustering of the T cells identified 2 clusters of CD4<sup>+</sup> (CD4.1-2) cells and 4 clusters of  
236 CD8<sup>+</sup> cells (CD8.1-4), with CD8<sup>+</sup> cells being the dominant T cell population (Supplementary Fig.  
237 S10A,B). Cellularity analysis showed that both CD4<sup>+</sup> and CD8<sup>+</sup> cell numbers were increased in  
238 P301S brains, and TPL2KD significantly reduced the abundance of both cell types (Supplementary  
239 Fig. S10C). When the relative abundance was compared within the T cell population, CD8.4, the  
240 largest T cell subcluster, was decreased in P301S;TPL2KD mouse brains (supplementary Fig.  
241 S10D). CD8.4 cells expressed some marker genes of exhausted T cells, such as *Nr4a2* and *Pdcd1*,  
242 which are usually induced by chronic/persistent exposure to antigens and/or inflammation (Odagui  
243 et al., 2020; Wherry, 2011; Wherry and Kurachi, 2015; Yi et al., 2010).

244

#### 245 **Normalization of microglial gene expression changes in P301S;TPL2KD mice**

246 To investigate the genotype-dependent gene expression changes in various cell types, we performed  
247 pseudo-bulk analysis for each cell type in this study (Fig. S11). Comparing TauP301S with non-  
248 transgenic mice, there were many differentially expressed genes (DEGs) across multiple cell types,  
249 such as astrocytes, microglia and oligodendrocytes (Fig. S11A). However, within the TauP301S  
250 group, when comparing TPL2-KD to TPL2-WT mice, DEGs were only detected in microglia (Fig  
251 6A), consistent with TPL2 being most highly expressed by microglia in the mouse brain  
252 (supplementary Fig. S1). Analysis of the protein coding DEGs showed that the most upregulated  
253 genes in P301S microglia were consistently upregulated to a lesser extent in P301S;TPL2KD  
254 microglia, including cytokines like *Tnf* and multiple immediate early genes (IEGs) such as *Egr1*  
255 (Fig. 6B,C).

256 To further analyze microglia phenotypes, the ~55,000 microglia in the study were sub-  
257 clustered into 22 clusters (Fig. 6D). As expected, clusters of microglia annotated as  
258 neurodegeneration-related and interferon-related were elevated, and clusters annotated as  
259 resting/homeostatic were decreased in TauP301S mice (supplementary Fig. S11, S12). However,  
260 the abundance of these clusters in P301S mice were not altered by TPL2KD (supplementary Fig.  
261 S11, S12). On the other hand, a subcluster of microglia (C11) expressing high levels of IEGs (e.g.  
262 *Fos*, *Egr1-3*, *Atf3*) (supplementary Fig. S11E), was elevated in P301S mice, and this elevation was  
263 ameliorated by TPL2KD (Fig 6E). Calculation of IEG gene set score for every defined cell type  
264 (pseudo-bulk) showed IEG expression was up in astrocytes, microglia, oligodendrocytes, OPCs  
265 and VSMCs, but the upregulation was only normalized by TPL2-KD in microglia (and to some  
266 extent in VSMCs, although not statistically significant, supplementary Fig. S11G). As IEG  
267 expression can be regulated by MAPK signaling pathways and TPL2 is a key regulator of MAPK  
268 signaling (Bahrami and Drablos, 2016; O'Donnell et al., 2012), these results are consistent with a



269 specific role for TPL2 in TauP301S microglia. Another subcluster of microglia (C20) that was  
270 elevated in P301S and normalized by TPL2KD in the P301S mice expressed high levels of MHC  
271 (major histocompatibility complex) class II genes (e.g. *Cd74*, *H2-Aa*, *H2-Ab1*, etc.), which are  
272 usually expressed by antigen presenting cells (APCs) and are important for the generation of  
273 immune responses via interaction with T cells (Neeffjes et al., 2011; Roche and Furuta, 2015) (Fig  
274 6F, supplementary Fig. S11F). The reduction of P301S MHCII expressing microglia by TPL2KD  
275 in P301S mice combined with the reduction of infiltrating T cells and dendritic cells points to a  
276 normalization of adaptive immune function in P301S brains.

277

### 278 **TPL2KD ameliorates dendritic spine loss and brain atrophy in TauP301S mice**

279 Given that TPL2KD provided neuroprotection *in vitro*, decreased gliosis, immune cell  
280 infiltration, and altered microglia states in P301S mice, we next asked if TPL2KD provides  
281 neuroprotection in P301S mice. As microglia-mediated synapse elimination has been observed in  
282 AD mouse models including P301S mice (Hansen *et al.*, 2018; Stephan et al., 2012; Wilton et al.,  
283 2019), we quantified synapse density by measuring spine number in sparsely labeled dendrites  
284 using GFP expression driven by the Thy1-GFP-M transgene. Spine analysis by *ex vivo* imaging  
285 found that P301S;TPL2KD mice had significantly increased spine density compared to P301S mice  
286 (Fig. 7A), consistent with potentially reduced microglia removal of spines in P301S;TPL2KD mice.

287 Previous studies have shown that TauP301S mice develop neurodegeneration, including  
288 ventricle enlargement and brain volume reduction, that can be measured by volumetric MRI  
289 (vMRI) (Dejanovic *et al.*, 2018; Wu *et al.*, 2019). We next investigated if TPL2-KD could protect  
290 against neurodegeneration in tauopathy mice using longitudinal vMRI. In WT mice, ventricle  
291 volumes stayed stable and neocortex and whole brain volumes increased between 6 and 9 months,  
292 and TPL2 kinase deficiency did not alter the trajectory of the brain volume changes. As expected,  
293 P301S mice developed brain atrophy, as indicated by increasing ventricle volumes and decreasing  
294 brain volumes between 6 and 9 months. Strikingly, TPL2KD significantly ameliorated the ventricle  
295 enlargement and brain volume decline in TauP301S mice (Fig. 7B,C), indicating a robust  
296 neuroprotective effect of inhibition of TPL2 kinase activity in this mouse model. We also measured  
297 plasma NfL (neurofilament light chain) to see if this potential biomarker of neurodegeneration was  
298 reduced in parallel with the protection against brain volume loss. However, while plasma NfL was  
299 strongly increased in P301S mice, TPL2KD did not significantly affect NfL levels (Fig. 7D). This  
300 indicates that while plasma NfL increases in P301S mice, neuroprotection can be achieved  
301 irrespective of NfL levels.

302

### 303 **TPL2KD normalizes behavioral hyperactivity and memory deficits in TauP301S mice**

304 We next evaluated if the significant attenuation of neuroinflammation and neurodegeneration by  
305 TPL2 kinase ablation in tauopathy mice resulted in functional benefits. We first examined  
306 locomotor activity in an open field. As previously seen (Dejanovic *et al.*, 2018; Wu *et al.*, 2019),  
307 compared with WT mice, 9-month-old TauP301S mice displayed behavioral hyperactivity as  
308 indicated by significantly increased total beam breaks, ambulatory bouts and rearing behavior.  
309 TPL2 kinase activity deficiency did not impact the locomotor activity of non-transgenic mice, but  
310 prevented the hyperactivity in the tauopathy mice (Fig. 7E). To assess the learning and memory  
311 functions of these mice, we performed the trace fear conditioning test, a memory test requiring both  
312 hippocampus and cortex function (Burman *et al.*, 2014; Han *et al.*, 2003; Sharma *et al.*, 2018). Mice  
313 were trained to associate aversive shock with a neutral auditory tone stimulus. When tested 24  
314 hours later, WT mice exhibited elevated freezing behavior in response to the auditory stimulus as  
315 expected. P301S mice had somewhat elevated baseline freezing behavior, and failed to exhibit an  
316 increase in freezing behavior in response to the auditory stimulus, indicating potential learning and  
317 memory deficits. In contrast, P301S;TPL2KD mice showed normal baseline freezing behavior and  
318 elevated freezing behavior in response to the tone stimulus (Fig. 7F). Thus, in addition to reducing  
319 neuroinflammation, and protecting against synapse and neuron loss, eliminating TPL2 kinase  
320 activity rescues behavioral alterations in P301S mice.

321

### 322 **Discussion**

323 Multiple aspects of neuroinflammation have been implicated in both preclinical AD models and  
324 AD patient brains, and studies with inhibition of specific neuroinflammation pathways have shown  
325 beneficial effects in tauopathy and AD models (Dejanovic *et al.*, 2018; Gate *et al.*, 2020; Heneka  
326 *et al.*, 2013; Hong *et al.*, 2016; Ising *et al.*, 2019; Laurent *et al.*, 2017; Liddelow *et al.*, 2017; Merlini  
327 *et al.*, 2018; Ndoja *et al.*, 2020; Wu *et al.*, 2019). Here we focused on TPL2 which, as a master  
328 regulator of the peripheral immune system that is expressed by microglia, could have pleiotropic  
329 effects on neuroinflammation. *In vitro* studies show that similar to its function in the peripheral  
330 immune system, TPL2 is also key regulator of microglia in the brain. Pharmacological or genetic  
331 inhibition of TPL2 reduced cytokine release and iNOS induction by stimulated microglia in culture  
332 and rescued neurodegeneration in a co-culture model. TPL2KD mice also exhibited strongly  
333 ameliorated microglia and astrocyte activation and brain cytokine levels following acute peripheral  
334 LPS challenge *in vivo*.

335 Based on the potentially beneficial effects of reduced TPL2 kinase function in response to  
336 direct stimuli *in vitro* and *in vivo*, we tested the effects of TPL2KD in *in vivo* neurodegeneration

337 models. That TPL2KD lessened gliosis but did not provide neuroprotection in optic nerve crush  
338 and stroke models is perhaps not surprising given the direct severe neuronal damage in these models  
339 of acute injury. In contrast the beneficial effects in the TauP301S mice indicate that modulating  
340 immune cell function via eliminating TPL2 kinase activity can be beneficial in a context with  
341 chronic neuroinflammation where neurodegeneration gradually occurs over time. This fits with a  
342 general model of neuroinflammation in chronic neurodegenerative conditions, where an initial  
343 pathology (in this case Tau) results in glial cell activation, and over time activated glial cells  
344 contribute to neuronal damage. The partial rescue of brain volume loss in TauP301S mice with  
345 TPL2KD likely corresponds to protection of stressed but functional brain tissue that is being  
346 destroyed by the inflammatory response to Tau pathology in the brain. Consistent with this, NfL  
347 levels are not rescued with TPL2KD, which could reflect ongoing NfL production by the protected  
348 brain tissue. At the same time it is clear that despite ongoing stress from transgenic Tau production,  
349 the increased synapse density and brain volume represent preservation of functional neuronal  
350 circuits, as the behavioral phenotypes in P301S were rescued in P301S;TPL2KD mice, indicating  
351 functional benefits.

352         The tauopathy model study reveals multiple aspects of pathophysiology that are normalized  
353 by TPL2KD concordant with rescue of neurodegeneration and behavior. This includes reductions  
354 of the levels of various cytokines, normalization of increased T cell and dendritic cell abundance  
355 in the brain, and reduction in the IEG and MHCII subpopulations of activated microglia. This  
356 points to future avenues of research examining which features are of particular importance in the  
357 protective effects of TPL2KD. For example, do specific cytokines play critical roles in  
358 pathophysiology? Is an aberrant role for adaptive immunity in the brain critical to degeneration?  
359 Are changes in subpopulations of activated microglia critical? Or are the pleiotropic effects of  
360 TPL2 kinase deficiency in combination required for benefit?

361         Microglia orchestrate both protective and damaging responses during neurodegeneration  
362 in conditions such as Alzheimer's disease (Bohlen et al., 2019; Hansen *et al.*, 2018). While our  
363 results support a beneficial role of reducing microglia activation by inhibiting TPL2, other recent  
364 therapeutic approaches have focused on boosting microglia activation to accelerate clearance of  
365 disease related protein aggregates, such enhancing TREM2-mediated, stimulation of microglia  
366 phagocytosis of A $\beta$  (Fassler et al., 2021; Wang et al., 2020). Thus, TPL2 inhibition to reduce the  
367 harmful aspects of microglia-mediated inflammation could potentially be combined with other  
368 approaches to boost beneficial effects of microglia activation.

369         Overall, our data indicate that reducing the inflammatory state of the brain with approaches  
370 such as targeting TPL2 kinase activity could be a potential therapeutic approach for diseases with

371 chronic neuroinflammation. Our data also highlight various TPL2-dependent features of  
372 neuroinflammation include elevated brain cytokine levels peripheral immune cell infiltration,  
373 specific activation states of microglia, etc. that could be explored as other potential therapeutic  
374 approaches.

375

376

## 377 **Materials and methods**

### 378 **Animal Use**

379 All rodent experiments were approved by the Genentech Animal Care and Use Committee and  
380 followed the National Institutes of Health *Guide for the Care and Use of Laboratory Animals*.

381

### 382 **Rodent models**

383 All rodent experiments were approved by the Genentech Animal Care and Use Committee  
384 and followed the National Institutes of Health *Guide for the Care and Use of Laboratory Animals*.  
385 TauP301S mice expressing human Tau with the P301S mutation, driven by the PrP promoter  
386 (Yoshiyama *et al.*, 2007) were crossed to TPL2 kinase-deficient mice carrying D270A mutation  
387 generated in-house (Senger *et al.*, 2017). All TauP301S mice were heterozygous for the TauP301S  
388 transgene and all TPL2-KD mice were homozygous for the TPL2-D270A mutation. For the stroke  
389 study, TPL2 kinase-deficient rats carrying D270A mutation generated by Genentech were used.  
390 Cohorts were produced with all genotypes as littermates. Experimenters were blind to genotype for  
391 all behavioral measurements, microscopic, and histological analyses.

392

### 393 **Human post mortem brain tissue**

394 Post mortem brain tissue (superior frontal gyrus) was obtained from patients with putative  
395 AD as indicated by cognitive evaluation scores (“EAD”) or pathology-confirmed AD (“AD”)  
396 along with age-matched controls from Folio Biosciences. Human samples were procured with  
397 Ethics Committee approval and written informed consent. Adult male and female patients aged 63-  
398 93 years were used in this study.

399

### 400 **Immunoblotting**

401 Cells were directly lysed in 2x reducing SDS sample buffer. Mouse brain tissues were  
402 homogenized in cold RIPA buffer (50 mM Tris-HCl, 150 mM NaCl, 2 mM EDTA, 1% NP-40,  
403 0.1% SDS) supplemented with phosphatase and protease inhibitors, using a TissueLyser (2 ×  
404 30 Hz, 3 min at 4°C; QIAGEN). After homogenization, samples were centrifuged at 20,000 g for

405 20 min and the supernatants were transferred into new tubes. The supernatants were then boiled in  
406 reducing SDS sample buffer. For human brain tissues, after homogenization in RIPA buffer, SDS  
407 loading buffer (final 1.5x) without bromophenol blue/DTT was added to the lysates and the lysates  
408 were sonicated. Then the lysates were boiled for 5 min and centrifuged at 15,000 rpm for 15 min.  
409 The supernatants were collected. After protein concentrations were measured using BCA reagents  
410 (Thermo Fisher), bromophenol blue and DTT were added to the supernatants. The protein samples  
411 were separated by Novex Tris-Glycine SDS-PAGE gels (Invitrogen) and transferred to  
412 nitrocellulose membranes (Bio-Rad). Membranes were then blocked with 5% milk in TBST or  
413 Licor blocking buffer for one hour (RT) and incubated with primary antibodies (in 5% milk or 2%  
414 milk in TBST or Licor blocking buffer with 0.1% Tween20, 4°C overnight), and then secondary  
415 HRP-conjugated antibodies (two hours RT). Chemiluminescence signals were detected on  
416 ChemiDoc (Bio-Rad). Data analysis was done using Image Lab software (Bio-rad). Antibodies  
417 used for western blots are: anti-ERK(1/2) (#9102S; RRID: AB\_330744), anti-phospho-ERK  
418 (Thr202/Tyr204) (#4370S; RRID: AB\_2315112), anti-p38 (#9212S; RRID: AB\_330713), anti-  
419 phospho-p38 (Thr180/Tyr182) (#9211S; RRID: AB\_331641), anti-NF-κB p65 (#8242S; RRID:  
420 AB\_10859369), anti-phospho-NF-κB p65 (Ser536) (#3033S; RRID: AB\_331284), anti-iNOS  
421 (clone D6B6S, #13120S; RRID: AB\_2687529), anti-β-Actin (#4970S; RRID: AB\_2223172). The  
422 above antibodies are all from Cell Signaling Technology, Danvers, MA, USA. TPL2 antibody is  
423 from Santa Cruz Biotechnology (sc-373677; RRID: AB\_10915433). Calnexin antibody is from  
424 Enzo lifesciences (#ADI-SPA-865-F; RRID: AB\_11180747).

425

#### 426 **Neuron and microglia co-culture assay**

427 Mouse embryonic cortical neurons were cultured as described previously (Friedman *et al.*,  
428 2018). Briefly, cortices from day 15 C57BL/6N embryos (E15) were dissected and washed thrice  
429 with pre-cooled Hank's balanced salt solution (HBSS; Invitrogen). Cortical tissue was incubated  
430 for 10 minutes at 37°C in HBSS supplemented with 0.25% trypsin (Invitrogen, CA, USA) and  
431 DNase I (Roche CustomBiotech, IN, USA). Tissue was washed thrice with cold HBSS and  
432 triturated in plating media containing DNase I (Gibco Neurobasal Medium (Thermo Fisher  
433 Scientific, MA, USA), 20% heat-inactivated horse serum (Thermo Fisher Scientific), 25 mM  
434 sucrose, and 0.25% Gibco GlutaMAX (Thermo Fisher Scientific)). Dissociated cells were  
435 centrifuged at 125 g for 5 minutes at 4 °C. Cells were resuspended in the plating medium and plated  
436 on Poly-D-Lysine and laminin coated glass coverslips in 24-well plates (180k/well). After ~2 hours,  
437 the plating medium was replaced with NbAct4 culture medium (Brainbits). Cells were maintained

438 in an incubator at 37°C with 5% CO<sub>2</sub> and the medium was renewed using 50% exchange every 3-  
439 4 days to maintain cell health.

440 Primary microglia were cultured from P0-P2 pups as previously described(Yeh et al.,  
441 2016). Briefly, mouse brains were dissected out and the brain tissue was disrupted by trituration  
442 using a 10 mL serological pipette in cold DMEM media. The homogenate was spun at 300 g for 5  
443 min. The pellet was resuspended in DMEM media and filtered through a 70 µm cell strainer.  
444 Dissociated cells were cultured in 175 cm<sup>2</sup> flasks with media containing DMEM, 10%FBS and 1%  
445 penicillin/streptomycin. Flasks were rinsed with PBS and new media was added after 24 h. After  
446 ~12 days, microglia were shaken off (125rpm for 1hr), collected and added to one-week-old or  
447 two-week-old mouse cortical neuronal cultures at 1:1 cell number ratio. After 3 hrs, neuron and  
448 microglia co-cultures were stimulated with 25 ng/mL or 100 ng/mL LPS and 30 ng/mL interferon  
449 gamma. One day after stimulation (one-week-old neuron culture) or 3 days after stimulation (two-  
450 week-old neuron culture), cultures were fixed with 4% PFA for 10 min, rinsed with PBS, blocked  
451 with 10% goat serum with 0.1% Triton X-100 in PBS, incubated with primary antibodies (in block  
452 solution, 4°C, overnight), and then secondary antibodies (in block solution, RT, 1 hr). After  
453 staining, cells were mounted using Prolong Diamond Antifade Mountant with DAPI (Thermo  
454 Fisher). Primary antibodies used for immunostaining are: anti-MAP2 (Sigma-Aldrich, MO, USA,  
455 #M9942; RRID: AB\_477256), anti-Iba1 (synaptic systems, #234 004; RRID: AB\_2493179). Cells  
456 were imaged with a confocal laser scanning microscope LSM710 (Carl Zeiss) using Zen 2.3 SP1  
457 software (Carl Zeiss). Maximum intensity projection images were created using ImageJ.  
458 Immunostainings were analyzed using MATLAB software.

459

#### 460 **Cytokine measurements**

461 For primary microglia culture, after 24 hrs incubation with LPS (100 ng/mL) or vehicle  
462 control, culture supernatants were collected and cytokine levels in the samples were measured using  
463 a Bio-Plex Pro Mouse Cytokine 23-Plex Assay (Bio-Rad).

464 For in vivo studies, following perfusion with PBS, whole hemi brains (LPS i.p. injection  
465 study) or hippocampi (TPL2xTauP301S study) were isolated and homogenized in cold RIPA buffer  
466 as described above for preparation of immunoblotting samples. The protein concentration in each  
467 sample (supernatants after centrifugation) was measured by BCA (ThermoFisher). Cytokine levels  
468 in the samples were measured using mouse cytokine 23-Plex Assay (Bio-Rad) or mouse cytokine  
469 32-Plex Assay (Millipore) and normalized to total protein concentration.

470

#### 471 **Bulk RNA-seq**

472 ~3-month-old WT or TPL2-KD mice were injected with PBS vehicle control or LPS (10  
473 mg/kg) (n =5 per condition). 24 hours later, mice were perfused with cold PBS and the mouse hemi  
474 brains were immediately sub-dissected and preserved in RNAlater. RNA was extracted from  
475 samples using Qiagen RNeasy Plus Mini Kit. Concentration of RNA samples was determined using  
476 NanoDrop 8,000 (Thermo Scientific) and RNA integrity was determined by Fragment Analyzer  
477 (Advanced Analytical Technologies). 0.5 µg of total RNA was used as an input material for library  
478 preparation using TruSeq RNA Sample Preparation Kit v2 (Illumina). Library size was confirmed  
479 using a Fragment Analyzer (Advanced Analytical Technologies). Library concentrations were  
480 determined by qPCR-based using a Library quantification kit (KAPA). The libraries were  
481 multiplexed and then sequenced on Illumina HiSeq2500 (Illumina) to generate 30 M of single end  
482 50 base pair reads per library(Srinivasan *et al.*, 2016).

483 The fastq sequence files for all RNA-seq samples were filtered for read quality (keeping  
484 reads where at least 70% of the cycles had Phred scores  $\geq 23$ ), and ribosomal RNA contamination.  
485 The remaining reads were aligned to the mouse reference genome (GRCm38) using the GSNAP  
486 alignment tool(Wu and Nacu, 2010). These steps, and the downstream processing of the resulting  
487 alignments to obtain read counts were implemented in the Bioconductor package HTSeqGenie  
488 (<https://bioconductor.org/packages/release/bioc/html/HTSeqGenie.html>). Only uniquely mapped  
489 reads were used for further analysis. Differential gene expression analysis was performed with  
490 voom+limma(Law *et al.*, 2014).

491 For heatmaps (Fig. 3A-C), gene expression data were first normalized to nRPKM statistic  
492 as described (Law *et al.*, 2014), then transformed to a log<sub>2</sub> scale. Any values less than -40 XX were  
493 then replaced by 40, and standard Z-score calculation was performed (for each gene, subtracting  
494 mean and dividing by standard deviation) and then used for visualization.

495 Gene set scores were calculated as previously described (Friedman *et al.*, 2018). Briefly,  
496 gene expression values were first transformed (and stabilized) as log<sub>2</sub>(nRPKM+1). The gene set  
497 score for a sample was then calculated as the average over all genes in the set of log-transformed  
498 expression values.

499

### 500 **Single cell RNAseq**

501 9-month-old WT (n = 3), TPL2KD (n = 3), P301S (n = 6), or P301S;TPL2KD (n = 6) mice  
502 were perfused with cold PBS and the hippocampi were immediately sub-dissected. Single cell  
503 suspensions were prepared from the hippocampi as described (Lee *et al.*, 2021a). Briefly,  
504 hippocampi were chopped into small pieces and dissociated with enzyme mixes in a Neural Tissue  
505 Dissociation Kit (P) (Miltenyi 130-092-628) in the presence of actinomycin D. After dissociation,

506 cells were resuspended in Hibernate A Low Fluorescence medium (Brainbits) containing 5% FBS,  
507 with Calcein Violet AM (Thermo Fisher C34858) and propidium iodide (Thermo Fisher  
508 P1304MP). Flow cytometry was used to sort and collect live single-cell suspensions for the single-  
509 cell RNAseq study.

510 Sample processing and library preparation was carried out using the Chromium Single Cell  
511 3' Library and Gel Bead Kit v3 (10X Genomics) according to manufacturer's instructions. Cell-RT  
512 mix was prepared to aim 10,000 cells per sample and applied to Chromium Controller for Gel Bead-  
513 in-Emulsion (GEM) generation and barcoding. Libraries were sequenced with HiSeq 4000  
514 (Illumina). Single-cell RNA sequencing data were processed with an in-house analysis pipeline as  
515 described (Lee *et al.*, 2021a; Yartseva *et al.*, 2020). Reads were demultiplexed based on perfect  
516 matches to expected cell barcodes. Transcript reads were aligned to the mouse reference genome  
517 (GRCm38) using GSNAP (2013-10-10) (Wu and Nacu, 2010). Only uniquely mapping reads were  
518 considered for downstream analysis. Transcript counts for a given gene were based on the number  
519 of unique UMIs (up to one mismatch) for reads overlapping exons in sense orientation. Cell  
520 barcodes from empty droplets were filtered by requiring a minimum number of detected transcripts.  
521 Sample quality was further assessed based on the distribution of per-cell statistics, such as total  
522 number of reads, percentage of reads mapping uniquely to the reference genome, percentage of  
523 mapped reads overlapping exons, number of detected transcripts (UMIs), number of detected genes,  
524 and percentage of mitochondrial transcripts. After this primary analysis step, cells with less than  
525 1,000 total UMIs or greater than 10% mitochondrial UMIs were discarded. UMI normalization was  
526 performed by dividing each gene expression value for a cell by a factor proportional to the total  
527 number of transcripts in that cell. More precisely put, letting  $n_c$  represent the total number of UMIs  
528 for cell  $c$ , then the normalization factor  $f_c$  for that cell was given by

$$529 \quad f_c = \frac{n_c}{\text{median}_{c'}(n_{c'})}$$

530 (with  $c'$  going over all cells) and the “normalized UMIs” for gene  $g$  and cell  $c$  given  
531 by  $nUMI_{g,c} = n_c / f_c$ .

532 Seurat (Stuart *et al.*, 2019) was used to calculate PCA, tSNE coordinates and Louvain  
533 clustering for all cells (Figures 5A, 6D, S8B). Cell type markers from (Friedman *et al.*, 2018; Zeisel  
534 *et al.*, 2018) were used to identify major cell type clusters, and were interpreted using marker gene  
535 sets (Figures 5A, S6, S8B). Color scales in individual gene tSNE plots indicate gene expression on  
536 a log2 scale ( $\log_2(\text{normCount}+1)$ ). All gene sets used in this study are available in Table-S1.

537 T cells were extracted from the dataset, re-normalized and the 3,000 most variable genes  
538 were identified. Dimensionality reduction on the variable genes was performed using principal



539 component analysis and the top 30 principal components (PCs) were used as input to Louvain  
540 graph-based clustering and UMAP dimensionality reduction. T cell subtypes were identified based  
541 on the marker genes: *Cd3e*, *Cd4*, and *Cd8a*. Additional marker genes were determined using the  
542 *scoreMarker* function of the Bioconductor package *scrn* (Lun et al., 2016).

543 A cluster of doublets, co-expressing microglia and T-cell genes, and a cluster of T cells,  
544 only present in two animals and enriched for ribosomal proteins, were identified and excluded from  
545 downstream analyses.

546 T-cell subtype percentages were calculated for each sample either as a percentage of the  
547 total number of cells in a sample or as a percentage of the total number of T cells in a sample.

548 Pseudo-bulk of various cell type expression profiles were derived from single-cell datasets  
549 first by aggregating each sample's data for each cell type as described (Lee *et al.*, 2021a; Lee *et al.*,  
550 2021b). So, for  $n$  samples and  $m$  cell types there were  $n*m$  total possible pseudobulks (that is,  
551 aggregates of cells of a single type from a single sample). If fewer than 10 cells of a particular type  
552 were present in a given sample then they were discarded, so the actual total number of pseudo-  
553 bulks was less than  $n*m$ . A single "raw count" expression profile was created for each pseudo-bulk  
554 simply by adding the total number of UMIs for each gene across all cells of that type from that  
555 sample. This gave a gene-by-pseudo-bulk count matrix which was then normalized to a  
556 normalizedCount statistic using the *estimateSizeFactors* function from DESeq2 (Love et al., 2014),  
557 used for calculating gene set scores and visualizing gene expression, and for normalization factors  
558 for differential expression (DE) analysis. DE was performed on pseudo-bulk datasets using  
559 *voom+limma* methods for bulk RNA-seq. To put this into more formal notation, let  $n_{ij}$  be the raw  
560 UMI number of gene  $i$  in each cell type  $j$ . Let  $s_j$  indicate the sample of cell  $j$ . The pseudo-bulk count  
561 matrix  $B$ , with rows indexed by genes and columns indexed by samples (instead of cells) is defined  
562 as

$$B_{is} = \sum_{j: s_j = s} n_{ij}$$

563  
564 The matrix  $B$  is then size-factor normalized and analyzed using the standard methods of bulk RNA-  
565 seq, including differential expression (DE) analysis using *voom+limma* (Law *et al.*, 2014). DE  
566 analysis was performed mostly as previously described (Lee *et al.*, 2021a; Lee *et al.*, 2021b;  
567 Srinivasan *et al.*, 2020) using *voom+limma* methods for bulk RNA-seq. For each analysis (that is,  
568 for each pair of groups of pseudobulks to be compared), low expressed genes were filtered out.  
569 This was defined as genes with at least 10 total UMIs in at least 3 of the analyzed pseudobulks.  
570 Gene set scores for each pseudo-bulk profile were calculated as described above for ScRNA-seq  
571 data, except NormCount values were used in the place of nUMI values.

572 Cellularity (cellular composition) plots are plotted using `geom_boxplot`  
573 ([https://ggplot2.tidyverse.org/reference/geom\\_boxplot.html](https://ggplot2.tidyverse.org/reference/geom_boxplot.html)). The lower and upper hinges  
574 correspond to the first and third quartiles (the 25th and 75th percentiles). The upper whisker extends  
575 from the hinge to the largest value no further than  $1.5 * IQR$  from the hinge (where IQR is the inter-  
576 quartile range, or distance between the first and third quartiles). The lower whisker extends from  
577 the hinge to the smallest value at most  $1.5 * IQR$  of the hinge. Data beyond the end of the whiskers  
578 are called "outlying" points and are plotted individually (Cleveland and McGill, 1985). P values  
579 are based on t-test between indicated groups using `ggpubr`.

580

### 581 **Ex vivo imaging analysis of dendritic spine density**

582 9-month-old WT, TPL2KD, TauP301S or TauP301S;TPL2KD mice that also express  
583 Thy1-GFP-M transgene were euthanized, transcardially perfused with PBS, and brains were  
584 harvested. The brains were incubated for 48 hours in 4% PFA, and then washed with PBS and  
585 embedded in agarose for ex vivo imaging. Spines on apical dendrites of neurons in somatosensory  
586 cortex were imaged with a 2-photon laser scanning microscope (Prairie Technologies) using a Ti:  
587 sapphire laser (MaiTai DeepSee Spectra Physics; Newport) at 840 nm with a 60x numerical  
588 aperture 1.0 objective lens (Olympus). The image resolution is 0.1  $\mu\text{m}/\text{pixel}$  across a 1024\*1024-  
589 pixel field of view (FOV) using 0.5 mm Z-steps. In each mouse, 6 cells (1 dendrite/cell) were  
590 collected. A custom, semiautomated image analysis routines in MATLAB (MathWorks) was used  
591 to generate dendritic spine density. The density is calculated as the total number of spines divided  
592 by the length of the corresponding dendrite. Imaging and analysis were performed under blinded  
593 conditions.

594

### 595 **Longitudinal Volumetric brain MRI imaging**

596 MRI was performed on a 7T Bruker (Billerica, MA) system with a 4-channel receive-only  
597 cryogen-cooled surface coil and a volume transmit coil (Bruker, Billerica, MA). T2-weighted  
598 images were acquired with a multi-spin echo sequence: TR 5100 ms, TE 10, 20, 30, 40, 50, 60, 70,  
599 80ms, 56 contiguous axial slices of 0.3mm thickness, FOV 19.2 mm x 19.2 mm, matrix size 256 x  
600 128, 1 average, with a scan time of 11 min/mouse. During imaging, anesthesia for mouse was  
601 maintained at 1.5% isoflurane and rectal temperature was maintained at  $37 \pm 1$  °C using a feedback  
602 system with warm air (SA Instruments, Stony Brook, NY). Equal number of males and females  
603 were included to detect any gender difference. The regional and voxel differences in the brain  
604 structure were evaluated by registration-based region of interest (ROI) analysis. In brief, multiple  
605 echo images were averaged and corrected for field inhomogeneity to maximize the contrast to noise

606 ratio and the images were analyzed based on a 20-region pre-defined in-vivo mouse atlas  
607 (<http://brainatlas.mbi.ufl.edu/>) that was co-registered to a study template and warped to individual  
608 mouse datasets. All the co-registration steps were performed in SPM8 (Wellcome Trust Centre for  
609 Neuroimaging, UCL, UK).

610

### 611 **Histology**

612 Mice were deeply anesthetized and transcardially perfused with phosphate-buffered saline  
613 (PBS). Hemi-brains were drop fixed for 48h at 4 C in 4% paraformaldehyde as previously  
614 described(Wu *et al.*, 2019). After being cryoprotected and frozen, up to 40 hemi-brains were  
615 embedded per block in a solid matrix and sectioned coronally at 30  $\mu$ m (MultiBrain processing by  
616 NeuroScience Associates, NSA) before being mounted onto slides. TauP301S x TPL-KD cohort  
617 brain sections were stained for AminoCu, AT8, GFAP, Iba1, CD68 and NeuN at NSA using  
618 established protocols. Brightfield slides processed by NeuroScience Associates were imaged on the  
619 Nanozoomer system (Hamamatsu Corp, San Jose, CA, USA) at 200x magnification with a  
620 resolution of 0.46 micron/pixel. Quantification of chromogenic staining (AminoCu, NeuN, GFAP,  
621 Iba1, AT8, CD68) area was performed using grayscale and color thresholds(Brey *et al.*, 2003)  
622 followed by morphological operations. Positive stain area was normalized to the whole brain  
623 section or manually marked up hippocampal area.

624

### 625 **Open field Behavior**

626 Spontaneous locomotor activity of 9-month-old males and 9-month-old females was  
627 measured with an automated Photobeam Activity System-Open Field (San Diego Instruments)(Wu  
628 *et al.*, 2019). Mice were placed individually in a clear plastic chamber (41L x 41W x 38H cm)  
629 surrounded by a locomotor frame and a rearing frame fitted with 16 x 16 infrared (IR) beams to  
630 record horizontal locomotor activity (3 cm above the floor) and vertical rearing activity (7.5 cm  
631 above the floor), respectively. The total number of beam breaks for both horizontal and vertical  
632 movements was calculated for a total of 20 min.

633

### 634 **Trace fear conditioning**

635 10-month-old female mice were individually placed in a fear-conditioning chamber (30 x  
636 24 x 24 cm measured inside of the chamber) located inside of a sound-attenuating cubicle (Med  
637 Associates). Each chamber was equipped with a house light, an IR light, a speaker that was used to  
638 deliver white noise during the training and cued phases of the task, and a near-IR camera to record  
639 the movement and/or freezing of the mice. The floors of the compartments were equipped with

640 stainless steel metal grids that were connected to a shock generator. Hardware and data acquisition  
641 were controlled by Video-Freeze software (Med Associates).

642 During TFC training, the house lights were on and the metal grids served as the floor. TFC  
643 training began with 180 s of baseline recording in which the mice were allowed to explore the  
644 chamber, followed by 6 CS-US trials, each consisting of a 20 s tone (90 dB white noise) as the  
645 conditioned stimulus, followed by an 18 s trace interval, then a 2 s foot shock (0.5 mA) as the  
646 unconditioned stimulus, and finally a 30 s delay. After the 6 CS-US presentations were completed,  
647 the mice were returned to their home cage.

648 The TFC test was administered 24 hours following training. During TFC testing, the  
649 context of the chamber was altered by switching off the house lights, covering the grid floor with  
650 a plastic inlay, altering the shape of the chamber walls by another insert, and changing the scent of  
651 the chamber with a small amount of 1% acetic acid. Mice had 180 s of baseline recording to explore  
652 the new altered context before the CS tone used in training was presented for 20 s, followed by a  
653 20 s trace interval and a 30 s delay. No foot shock was administered during the test. The freezing  
654 behavior of the mice during the trace intervals of the training and testing phases were recorded  
655 using a near infrared camera and the percentage time freezing was calculated using Video Freeze  
656 software (Med Associates).

657

#### 658 **Plasma NfL measurements**

659 NfL and p-NfH were measured by Simoa platform at Quanterix, Inc, Billerica, MA, using  
660 NF-Light Advantage Kit (#103186) and pNF-heavy Discovery Kit (#102669).

661

#### 662 **Optic nerve crush model**

663 Optic nerve crush was performed as previously described (Watkins et al., 2013). ~3-month-  
664 old WT or TPL2KD mice were used. The left eye of each animal was subjected to optic nerve crush  
665 injury via an intraorbital approach under deep anesthesia. An incision was made on the superior  
666 conjunctiva of the surgery eye, and the optic nerve was exposed. The crush injury was inflicted for  
667 1 s using a 45° angled fine-tip forceps 1–2 mm from the eyeball. Unoperated right eyes were used  
668 as controls.

669 Whole-Mount retina immunohistochemistry was performed as previously described  
670 (Watkins *et al.*, 2013). Mouse eyes were collected and fixed in 4% paraformaldehyde (PFA) at  
671 room temperature for 1-2 hrs. After two washes in PBS, retinas were dissected out and  
672 permeabilized in PBST (0.5% Triton-X100) for 1 hour. The retinas were then incubated in blocking  
673 buffer (5% donkey serum and 0.5% Triton X-100 in PBS) at 4°C overnight, followed by overnight

674 incubation at 4°C in primary antibodies, including anti-RBPMS (Phosphosolutions, #1830-  
675 RBPMS) and anti-Iba1 (synaptic systems, #234 004) diluted in blocking buffer. After washing in  
676 PBST for 6 hrs at 4°C (6 washes; one hour each), the retinas were incubated overnight at 4°C with  
677 secondary antibodies and washed with PBST for 6 hrs. Before mounting on slides, each retina was  
678 rinsed in PBS and was cut with 4-5 slits along the radial axes from the edge to about two-thirds of  
679 the radius to flatten the retina and then mounted on slides. Number of RGCs and microglia were  
680 counted using MATLAB software.

681

## 682 **Rat stroke model**

683 Rat stroke model was performed as previously described(Stark et al., 2021). All animal  
684 experiments were performed as specified in the license authorized by the national Animal  
685 Experiment Board of Finland (Eläinkoelautakunta, ELLA) and according to the National Institutes  
686 of Health (Bethesda, MD, USA) guidelines for the care and use of laboratory animals. In total, 60  
687 adult male rats (30 WT and 30 TPL2 KD) were generated through intercrossing and assigned to the  
688 study at the age of ~9–10 weeks old. Transient focal cerebral ischemia was produced by middle  
689 cerebral artery (MCA) occlusion in right hemisphere of brain in male rats. The rats were  
690 anesthetized with 5% isoflurane. During the operation, the concentration of anesthetic was reduced  
691 to 1.0–1.5%. After midline skin incision, the right common carotid artery (CCA) was exposed, and  
692 the external carotid artery (ECA) was ligated distal from the carotid bifurcation. Filament with  
693 silicon-covered tip (Doccol filament 4–0, dia 0,185 mm, silicon 5–6 mm/dia 0.35 mm) was inserted  
694 22–23 mm into the internal carotid artery (ICA) up to the origin of MCA. Directly after occlusion,  
695 animals were assessed with DWI as described below. After 90 min of ischemia, the MCA blood  
696 flow was restored by removal of the thread. The wound was closed and the animals were allowed  
697 to recover from anesthesia. Sham animals underwent identical procedures, including anesthesia  
698 regime, but without the filament insertion and actual tMCAO.

699 Lesion size, tissue viability (T2 in milliseconds) and brain edema were determined using  
700 absolute T2-MRI on days 2, 15, and 30. MRI acquisition was performed using a horizontal 7T  
701 magnet with bore size 160 mm equipped with a gradient set capable of max. gradient strength  
702 750 mT/m and interfaced to a Bruker Avance III console (Bruker Biospin GmbH, Ettlingen,  
703 Germany) as described in(Stark *et al.*, 2021). Multi-slice multi-echo sequence was used with the  
704 following parameters; TR = 2.5 s, 12 different echo times (10–120 ms in 10 ms steps) and 4  
705 averages. Eighteen (18) coronal slices of thickness 1 mm were acquired using field-of-view  
706 30 × 30 mm<sup>2</sup> and 256 × 128 imaging matrix. Blinded volumetric analysis was performed manually,  
707 with lesions delineated based on the contrast differences between lesioned and healthy tissues in

708 the ipsilateral side taking into account reference values and contralateral hemisphere as internal  
709 control.

710 A 20-point neuroscore test was used to assess post-tMCAO motor and behavioral deficits  
711 at baseline, and on days 1, 3, 7, 14, 21, and 28 post-tMCAO. The neurological test was conducted  
712 and analyzed in a blinded manner. The following parameters were analyzed: Spontaneous circling  
713 (max. score 4), motility (max. score 3), general condition (max. score 3), paw placement on table  
714 top (max. score 4, 1 point per paw), righting reflex when placed on back (max. score 1), grip  
715 strength (max. score 2), contralateral reflex (max. score 1), visual forepaw reaching (max. score 2,  
716 1 for each paw).

717 At the end-point (D30), the rats were transcardially perfused with heparinized (2.5 IU/ml)  
718 saline in order to remove blood from the brains and tissues. After perfusion with heparinized  
719 (2.5 IU/ml) saline, mice were perfused with 4% paraformaldehyde until fixed. Thereafter, whole  
720 brains were further immersion fixed in 4% paraformaldehyde in 0.1 M phosphate buffer (PB) for  
721 another 48 hr. Brains were then transferred to 0.1 M phosphate buffer (PB) and stored at 2–4 °C  
722 until analysis.

723 Immunohistochemistry was performed at NeuroScience Associates (Knoxville, TN, USA)  
724 as described above. The slides were digitally scanned by NeuroScience Associates using the  
725 TissueScope LE120 (Huron Digital Pathology, Ontario, Canada) slide scanner at a resolution of  
726 0.40 micron/pixel. Quantitative image analysis was performed with the MatLab software package  
727 (MathWorks). Stained or immunolabeled areas were quantified in each hemisphere and normalized  
728 based on the total hemisphere tissue area. At least 27 serial sections were analyzed per stain per  
729 mouse and final scores were based on the average of those sections.

730

### 731 **Statistical analysis**

732 Data were analyzed using either GraphPad Prism or R. Statistical testing used for each analysis was  
733 listed in the corresponding figure legend. Data are represented by mean +/- SEM. Comparisons  
734 were considered statistically significant when  $p < 0.05$ .

735

### 736 **Data and materials availability:**

737 Sequencing data are available on GEO. Accessions numbers are: Single Cell RNAseq including  
738 P301S mice: GSE180041; Bulk RNAseq WT or TPL2-KD mice injected with PBS or LPS:  
739 GSE196401; Bulk RNAseq WT and TauP301S mouse hippocampus: GSE186414

740 **Acknowledgements**

741 We thank members of the Genentech animal care staff, fluorescence-activated cell sorting (FACS)  
742 laboratory, and CALM and RNA sequencing laboratory for research support. We thank Dwight  
743 Newton for uploading GSE196401 to GEO. We thank Chris Bohlen and Mark Wilson for critical  
744 reading of the manuscript.

745

746 **Author contributions**

747 Y.W., M.S and J.E.H. designed the project. Y.W., T.W., M.-C.T, L.X., K.S., M.S and J.E.H.  
748 designed and interpreted the experiments. Y.W., T.W., M.-C.T performed experiments and  
749 analyzed data. M.G.R., A.M.A., L.X., V.D.G., H.N., K.S., C.G., O.F., and B.A.F. analyzed the  
750 data. D.X. provided reagents. Y.W. and J.E.H wrote the manuscript. All authors read and edited  
751 the manuscript.

752

753 **Declaration of interests**

754 All authors are current or former employees of Genentech and Roche. The authors declare no  
755 competing financial interests.

756

757

758

759

760

761

762

763

764

765

766

767

768

769

770

771

772

773

774 **References**

- 775 Aran, D., Looney, A.P., Liu, L., Wu, E., Fong, V., Hsu, A., Chak, S., Naikawadi, R.P.,  
776 Wolters, P.J., Abate, A.R., et al. (2019). Reference-based analysis of lung single-cell  
777 sequencing reveals a transitional profibrotic macrophage. *Nat Immunol* 20, 163-  
778 172. 10.1038/s41590-018-0276-y.
- 779 Arthur, J.S., and Ley, S.C. (2013). Mitogen-activated protein kinases in innate  
780 immunity. *Nat Rev Immunol* 13, 679-692. 10.1038/nri3495.
- 781 Bahrami, S., and Drablos, F. (2016). Gene regulation in the immediate-early  
782 response process. *Adv Biol Regul* 62, 37-49. 10.1016/j.jbior.2016.05.001.
- 783 Bohlen, C.J., Friedman, B.A., Dejanovic, B., and Sheng, M. (2019). Microglia in Brain  
784 Development, Homeostasis, and Neurodegeneration. *Annu Rev Genet* 53, 263-288.  
785 10.1146/annurev-genet-112618-043515.
- 786 Brey, E.M., Lalani, Z., Johnston, C., Wong, M., McIntire, L.V., Duke, P.J., and Patrick,  
787 C.W., Jr. (2003). Automated selection of DAB-labeled tissue for  
788 immunohistochemical quantification. *J Histochem Cytochem* 51, 575-584.  
789 10.1177/002215540305100503.
- 790 Bright, F., Werry, E.L., Dobson-Stone, C., Piguet, O., Ittner, L.M., Halliday, G.M.,  
791 Hodges, J.R., Kiernan, M.C., Loy, C.T., Kassiou, M., and Kril, J.J. (2019).  
792 Neuroinflammation in frontotemporal dementia. *Nat Rev Neurol* 15, 540-555.  
793 10.1038/s41582-019-0231-z.
- 794 Burman, M.A., Simmons, C.A., Hughes, M., and Lei, L. (2014). Developing and  
795 validating trace fear conditioning protocols in C57BL/6 mice. *J Neurosci Methods*  
796 222, 111-117. 10.1016/j.jneumeth.2013.11.005.
- 797 Cleveland, W.S., and McGill, R. (1985). Graphical perception and graphical methods  
798 for analyzing scientific data. *Science* 229, 828-833. 10.1126/science.229.4716.828.
- 799 Dejanovic, B., Huntley, M.A., De Maziere, A., Meilandt, W.J., Wu, T., Srinivasan, K.,  
800 Jiang, Z., Gandham, V., Friedman, B.A., Ngu, H., et al. (2018). Changes in the Synaptic  
801 Proteome in Tauopathy and Rescue of Tau-Induced Synapse Loss by C1q Antibodies.  
802 *Neuron* 100, 1322-1336 e1327. 10.1016/j.neuron.2018.10.014.
- 803 Didonna, A. (2020). Tau at the interface between neurodegeneration and  
804 neuroinflammation. *Genes Immun* 21, 288-300. 10.1038/s41435-020-00113-5.
- 805 Fassler, M., Rappaport, M.S., Cuno, C.B., and George, J. (2021). Engagement of TREM2  
806 by a novel monoclonal antibody induces activation of microglia and improves  
807 cognitive function in Alzheimer's disease models. *J Neuroinflammation* 18, 19.  
808 10.1186/s12974-020-01980-5.
- 809 Friedman, B.A., Srinivasan, K., Ayalon, G., Meilandt, W.J., Lin, H., Huntley, M.A., Cao, Y.,  
810 Lee, S.H., Haddick, P.C.G., Ngu, H., et al. (2018). Diverse Brain Myeloid Expression  
811 Profiles Reveal Distinct Microglial Activation States and Aspects of Alzheimer's  
812 Disease Not Evident in Mouse Models. *Cell Rep* 22, 832-847.  
813 10.1016/j.celrep.2017.12.066.
- 814 Gate, D., Saligrama, N., Leventhal, O., Yang, A.C., Unger, M.S., Middeldorp, J., Chen, K.,  
815 Lehallier, B., Channappa, D., De Los Santos, M.B., et al. (2020). Clonally expanded  
816 CD8 T cells patrol the cerebrospinal fluid in Alzheimer's disease. *Nature* 577, 399-  
817 404. 10.1038/s41586-019-1895-7.



818 Glass, C.K., Saijo, K., Winner, B., Marchetto, M.C., and Gage, F.H. (2010). Mechanisms  
819 underlying inflammation in neurodegeneration. *Cell* *140*, 918-934.  
820 [10.1016/j.cell.2010.02.016](https://doi.org/10.1016/j.cell.2010.02.016).  
821 Han, C.J., O'Tuathaigh, C.M., van Trigt, L., Quinn, J.J., Fanselow, M.S., Mongeau, R.,  
822 Koch, C., and Anderson, D.J. (2003). Trace but not delay fear conditioning requires  
823 attention and the anterior cingulate cortex. *Proc Natl Acad Sci U S A* *100*, 13087-  
824 13092. [10.1073/pnas.2132313100](https://doi.org/10.1073/pnas.2132313100).  
825 Hansen, D.V., Hanson, J.E., and Sheng, M. (2018). Microglia in Alzheimer's disease. *J*  
826 *Cell Biol* *217*, 459-472. [10.1083/jcb.201709069](https://doi.org/10.1083/jcb.201709069).  
827 Heneka, M.T., Kummer, M.P., Stutz, A., Delekate, A., Schwartz, S., Vieira-Saecker, A.,  
828 Griep, A., Axt, D., Remus, A., Tzeng, T.C., et al. (2013). NLRP3 is activated in  
829 Alzheimer's disease and contributes to pathology in APP/PS1 mice. *Nature* *493*, 674-  
830 678. [10.1038/nature11729](https://doi.org/10.1038/nature11729).  
831 Heng, T.S., Painter, M.W., and Immunological Genome Project, C. (2008). The  
832 Immunological Genome Project: networks of gene expression in immune cells. *Nat*  
833 *Immunol* *9*, 1091-1094. [10.1038/ni1008-1091](https://doi.org/10.1038/ni1008-1091).  
834 Hong, S., Beja-Glasser, V.F., Nfonoyim, B.M., Frouin, A., Li, S., Ramakrishnan, S., Merry,  
835 K.M., Shi, Q., Rosenthal, A., Barres, B.A., et al. (2016). Complement and microglia  
836 mediate early synapse loss in Alzheimer mouse models. *Science* *352*, 712-716.  
837 [10.1126/science.aad8373](https://doi.org/10.1126/science.aad8373).  
838 Ising, C., Venegas, C., Zhang, S., Scheiblich, H., Schmidt, S.V., Vieira-Saecker, A.,  
839 Schwartz, S., Albasset, S., McManus, R.M., Tejera, D., et al. (2019). NLRP3  
840 inflammasome activation drives tau pathology. *Nature* *575*, 669-673.  
841 [10.1038/s41586-019-1769-z](https://doi.org/10.1038/s41586-019-1769-z).  
842 Laurent, C., Dorothee, G., Hunot, S., Martin, E., Monnet, Y., Duchamp, M., Dong, Y.,  
843 Legeron, F.P., Leboucher, A., Burnouf, S., et al. (2017). Hippocampal T cell infiltration  
844 promotes neuroinflammation and cognitive decline in a mouse model of tauopathy.  
845 *Brain* *140*, 184-200. [10.1093/brain/aww270](https://doi.org/10.1093/brain/aww270).  
846 Law, C.W., Chen, Y., Shi, W., and Smyth, G.K. (2014). voom: Precision weights unlock  
847 linear model analysis tools for RNA-seq read counts. *Genome Biol* *15*, R29.  
848 [10.1186/gb-2014-15-2-r29](https://doi.org/10.1186/gb-2014-15-2-r29).  
849 Lee, S.H., Meilandt, W.J., Xie, L., Gandham, V.D., Ngu, H., Barck, K.H., Rezzonico, M.G.,  
850 Imperio, J., Lalehzadeh, G., Huntley, M.A., et al. (2021a). Trem2 restrains the  
851 enhancement of tau accumulation and neurodegeneration by beta-amyloid  
852 pathology. *Neuron* *109*, 1283-1301 e1286. [10.1016/j.neuron.2021.02.010](https://doi.org/10.1016/j.neuron.2021.02.010).  
853 Lee, S.H., Rezzonico, M.G., Friedman, B.A., Huntley, M.H., Meilandt, W.J., Pandey, S.,  
854 Chen, Y.J., Easton, A., Modrusan, Z., Hansen, D.V., et al. (2021b). TREM2-independent  
855 oligodendrocyte, astrocyte, and T cell responses to tau and amyloid pathology in  
856 mouse models of Alzheimer disease. *Cell Rep* *37*, 110158.  
857 [10.1016/j.celrep.2021.110158](https://doi.org/10.1016/j.celrep.2021.110158).  
858 Leng, F., and Edison, P. (2021). Neuroinflammation and microglial activation in  
859 Alzheimer disease: where do we go from here? *Nat Rev Neurol* *17*, 157-172.  
860 [10.1038/s41582-020-00435-y](https://doi.org/10.1038/s41582-020-00435-y).  
861 Liddel, S.A., Guttenplan, K.A., Clarke, L.E., Bennett, F.C., Bohlen, C.J., Schirmer, L.,  
862 Bennett, M.L., Munch, A.E., Chung, W.S., Peterson, T.C., et al. (2017). Neurotoxic

863 reactive astrocytes are induced by activated microglia. *Nature* *541*, 481-487.  
864 [10.1038/nature21029](https://doi.org/10.1038/nature21029).

865 Love, M.I., Huber, W., and Anders, S. (2014). Moderated estimation of fold change  
866 and dispersion for RNA-seq data with DESeq2. *Genome Biol* *15*, 550.  
867 [10.1186/s13059-014-0550-8](https://doi.org/10.1186/s13059-014-0550-8).

868 Lun, A.T., McCarthy, D.J., and Marioni, J.C. (2016). A step-by-step workflow for low-  
869 level analysis of single-cell RNA-seq data with Bioconductor. *F1000Res* *5*, 2122.  
870 [10.12688/f1000research.9501.2](https://doi.org/10.12688/f1000research.9501.2).

871 Maphis, N., Xu, G., Kokiko-Cochran, O.N., Jiang, S., Cardona, A., Ransohoff, R.M., Lamb,  
872 B.T., and Bhaskar, K. (2015). Reactive microglia drive tau pathology and contribute  
873 to the spreading of pathological tau in the brain. *Brain* *138*, 1738-1755.  
874 [10.1093/brain/awv081](https://doi.org/10.1093/brain/awv081).

875 Merlini, M., Kirabali, T., Kulic, L., Nitsch, R.M., and Ferretti, M.T. (2018).  
876 Extravascular CD3+ T Cells in Brains of Alzheimer Disease Patients Correlate with  
877 Tau but Not with Amyloid Pathology: An Immunohistochemical Study.  
878 *Neurodegener Dis* *18*, 49-56. [10.1159/000486200](https://doi.org/10.1159/000486200).

879 Ndoja, A., Reja, R., Lee, S.H., Webster, J.D., Ngu, H., Rose, C.M., Kirkpatrick, D.S.,  
880 Modrusan, Z., Chen, Y.J., Dugger, D.L., et al. (2020). Ubiquitin Ligase COP1  
881 Suppresses Neuroinflammation by Degrading c/EBPbeta in Microglia. *Cell* *182*,  
882 1156-1169 e1112. [10.1016/j.cell.2020.07.011](https://doi.org/10.1016/j.cell.2020.07.011).

883 Neefjes, J., Jongsma, M.L., Paul, P., and Bakke, O. (2011). Towards a systems  
884 understanding of MHC class I and MHC class II antigen presentation. *Nat Rev*  
885 *Immunol* *11*, 823-836. [10.1038/nri3084](https://doi.org/10.1038/nri3084).

886 O'Donnell, A., Odrowaz, Z., and Sharrocks, A.D. (2012). Immediate-early gene  
887 activation by the MAPK pathways: what do and don't we know? *Biochem Soc Trans*  
888 *40*, 58-66. [10.1042/BST20110636](https://doi.org/10.1042/BST20110636).

889 Odagiu, L., May, J., Boulet, S., Baldwin, T.A., and Labrecque, N. (2020). Role of the  
890 Orphan Nuclear Receptor NR4A Family in T-Cell Biology. *Front Endocrinol*  
891 (Lausanne) *11*, 624122. [10.3389/fendo.2020.624122](https://doi.org/10.3389/fendo.2020.624122).

892 Papageorgiou, I.E., Lewen, A., Galow, L.V., Cesetti, T., Scheffel, J., Regen, T., Hanisch,  
893 U.K., and Kann, O. (2016). TLR4-activated microglia require IFN-gamma to induce  
894 severe neuronal dysfunction and death in situ. *Proc Natl Acad Sci U S A* *113*, 212-  
895 217. [10.1073/pnas.1513853113](https://doi.org/10.1073/pnas.1513853113).

896 Roche, P.A., and Furuta, K. (2015). The ins and outs of MHC class II-mediated antigen  
897 processing and presentation. *Nat Rev Immunol* *15*, 203-216. [10.1038/nri3818](https://doi.org/10.1038/nri3818).

898 Senger, K., Pham, V.C., Varfolomeev, E., Hackney, J.A., Corzo, C.A., Collier, J., Lau,  
899 V.W.C., Huang, Z., Hamidzhadeh, K., Caplazi, P., et al. (2017). The kinase TPL2  
900 activates ERK and p38 signaling to promote neutrophilic inflammation. *Sci Signal* *10*,  
901 [10.1126/scisignal.aah4273](https://doi.org/10.1126/scisignal.aah4273).

902 Sharma, V., Cohen, N., Sood, R., Ounallah-Saad, H., Gal-Ben-Ari, S., and Rosenblum, K.  
903 (2018). Trace Fear Conditioning: Procedure for Assessing Complex Hippocampal  
904 Function in Mice. *Bio Protoc* *8*, e2475. [10.21769/BioProtoc.2475](https://doi.org/10.21769/BioProtoc.2475).

905 Sheng, W., Zong, Y., Mohammad, A., Ajit, D., Cui, J., Han, D., Hamilton, J.L., Simonyi, A.,  
906 Sun, A.Y., Gu, Z., et al. (2011). Pro-inflammatory cytokines and lipopolysaccharide  
907 induce changes in cell morphology, and upregulation of ERK1/2, iNOS and sPLA(2)-

908 IIA expression in astrocytes and microglia. *J Neuroinflammation* 8, 121.  
909 10.1186/1742-2094-8-121.

910 Srinivasan, K., Friedman, B.A., Etxeberria, A., Huntley, M.A., van der Brug, M.P.,  
911 Foreman, O., Paw, J.S., Modrusan, Z., Beach, T.G., Serrano, G.E., and Hansen, D.V.  
912 (2020). Alzheimer's Patient Microglia Exhibit Enhanced Aging and Unique  
913 Transcriptional Activation. *Cell Rep* 31, 107843. 10.1016/j.celrep.2020.107843.

914 Srinivasan, K., Friedman, B.A., Larson, J.L., Lauffer, B.E., Goldstein, L.D., Appling, L.L.,  
915 Borneo, J., Poon, C., Ho, T., Cai, F., et al. (2016). Untangling the brain's  
916 neuroinflammatory and neurodegenerative transcriptional responses. *Nat Commun*  
917 7, 11295. 10.1038/ncomms11295.

918 Sriskantharajah, S., Guckel, E., Tsakiri, N., Kierdorf, K., Brender, C., Ben-Addi, A.,  
919 Veldhoen, M., Tschlis, P.N., Stockinger, B., O'Garra, A., et al. (2014). Regulation of  
920 experimental autoimmune encephalomyelitis by TPL-2 kinase. *J Immunol* 192,  
921 3518-3529. 10.4049/jimmunol.1300172.

922 Stark, K., Goncharov, T., Varfolomeev, E., Xie, L., Ngu, H., Peng, I., Anderson, K.R.,  
923 Verschueren, E., Choi, M., Kirkpatrick, D.S., et al. (2021). Genetic inactivation of RIP1  
924 kinase activity in rats protects against ischemic brain injury. *Cell Death Dis* 12, 379.  
925 10.1038/s41419-021-03651-6.

926 Stephan, A.H., Barres, B.A., and Stevens, B. (2012). The complement system: an  
927 unexpected role in synaptic pruning during development and disease. *Annu Rev*  
928 *Neurosci* 35, 369-389. 10.1146/annurev-neuro-061010-113810.

929 Straccia, M., Gresa-Arribas, N., Dentesano, G., Ejarque-Ortiz, A., Tusell, J.M., Serratos,  
930 J., Sola, C., and Saura, J. (2011). Pro-inflammatory gene expression and neurotoxic  
931 effects of activated microglia are attenuated by absence of CCAAT/enhancer binding  
932 protein beta. *J Neuroinflammation* 8, 156. 10.1186/1742-2094-8-156.

933 Stuart, T., Butler, A., Hoffman, P., Hafemeister, C., Papalexi, E., Mauck, W.M., 3rd, Hao,  
934 Y., Stoeckius, M., Smibert, P., and Satija, R. (2019). Comprehensive Integration of  
935 Single-Cell Data. *Cell* 177, 1888-1902 e1821. 10.1016/j.cell.2019.05.031.

936 Togo, T., Akiyama, H., Iseki, E., Kondo, H., Ikeda, K., Kato, M., Oda, T., Tsuchiya, K., and  
937 Kosaka, K. (2002). Occurrence of T cells in the brain of Alzheimer's disease and  
938 other neurological diseases. *J Neuroimmunol* 124, 83-92. 10.1016/s0165-  
939 5728(01)00496-9.

940 Wang, S., Mustafa, M., Yuede, C.M., Salazar, S.V., Kong, P., Long, H., Ward, M., Siddiqui,  
941 O., Paul, R., Gilfillan, S., et al. (2020). Anti-human TREM2 induces microglia  
942 proliferation and reduces pathology in an Alzheimer's disease model. *J Exp Med* 217.  
943 10.1084/jem.20200785.

944 Wang, W.Y., Tan, M.S., Yu, J.T., and Tan, L. (2015). Role of pro-inflammatory  
945 cytokines released from microglia in Alzheimer's disease. *Ann Transl Med* 3, 136.  
946 10.3978/j.issn.2305-5839.2015.03.49.

947 Watkins, T.A., Wang, B., Huntwork-Rodriguez, S., Yang, J., Jiang, Z., Eastham-  
948 Anderson, J., Modrusan, Z., Kaminker, J.S., Tessier-Lavigne, M., and Lewcock, J.W.  
949 (2013). DLK initiates a transcriptional program that couples apoptotic and  
950 regenerative responses to axonal injury. *Proc Natl Acad Sci U S A* 110, 4039-4044.  
951 10.1073/pnas.1211074110.

- 952 Webb, L.V., Ventura, S., and Ley, S.C. (2019). ABIN-2, of the TPL-2 Signaling Complex,  
953 Modulates Mammalian Inflammation. *Trends Immunol* *40*, 799-808.  
954 [10.1016/j.it.2019.07.001](https://doi.org/10.1016/j.it.2019.07.001).
- 955 Wherry, E.J. (2011). T cell exhaustion. *Nat Immunol* *12*, 492-499. [10.1038/ni.2035](https://doi.org/10.1038/ni.2035).  
956 Wherry, E.J., and Kurachi, M. (2015). Molecular and cellular insights into T cell  
957 exhaustion. *Nat Rev Immunol* *15*, 486-499. [10.1038/nri3862](https://doi.org/10.1038/nri3862).
- 958 Wilton, D.K., Dissing-Olesen, L., and Stevens, B. (2019). Neuron-Glia Signaling in  
959 Synapse Elimination. *Annu Rev Neurosci* *42*, 107-127. [10.1146/annurev-neuro-070918-050306](https://doi.org/10.1146/annurev-neuro-070918-050306).
- 961 Wu, T., Dejanovic, B., Gandham, V.D., Gogineni, A., Edmonds, R., Schauer, S.,  
962 Srinivasan, K., Huntley, M.A., Wang, Y., Wang, T.M., et al. (2019). Complement C3 Is  
963 Activated in Human AD Brain and Is Required for Neurodegeneration in Mouse  
964 Models of Amyloidosis and Tauopathy. *Cell Rep* *28*, 2111-2123 e2116.  
965 [10.1016/j.celrep.2019.07.060](https://doi.org/10.1016/j.celrep.2019.07.060).
- 966 Wu, T.D., and Nacu, S. (2010). Fast and SNP-tolerant detection of complex variants  
967 and splicing in short reads. *Bioinformatics* *26*, 873-881.  
968 [10.1093/bioinformatics/btq057](https://doi.org/10.1093/bioinformatics/btq057).
- 969 Xiao, Y., Jin, J., Chang, M., Nakaya, M., Hu, H., Zou, Q., Zhou, X., Brittain, G.C., Cheng, X.,  
970 and Sun, S.C. (2014). TPL2 mediates autoimmune inflammation through activation  
971 of the TAK1 axis of IL-17 signaling. *J Exp Med* *211*, 1689-1702.  
972 [10.1084/jem.20132640](https://doi.org/10.1084/jem.20132640).
- 973 Xu, D., Matsumoto, M.L., McKenzie, B.S., and Zarrin, A.A. (2018). TPL2 kinase action  
974 and control of inflammation. *Pharmacol Res* *129*, 188-193.  
975 [10.1016/j.phrs.2017.11.031](https://doi.org/10.1016/j.phrs.2017.11.031).
- 976 Yartseva, V., Goldstein, L.D., Rodman, J., Kates, L., Chen, M.Z., Chen, Y.J., Foreman, O.,  
977 Siebel, C.W., Modrusan, Z., Peterson, A.S., and Jovicic, A. (2020). Heterogeneity of  
978 Satellite Cells Implicates DELTA1/NOTCH2 Signaling in Self-Renewal. *Cell Rep* *30*,  
979 1491-1503 e1496. [10.1016/j.celrep.2019.12.100](https://doi.org/10.1016/j.celrep.2019.12.100).
- 980 Yeh, F.L., Wang, Y., Tom, I., Gonzalez, L.C., and Sheng, M. (2016). TREM2 Binds to  
981 Apolipoproteins, Including APOE and CLU/APOJ, and Thereby Facilitates Uptake of  
982 Amyloid-Beta by Microglia. *Neuron* *91*, 328-340. [10.1016/j.neuron.2016.06.015](https://doi.org/10.1016/j.neuron.2016.06.015).
- 983 Yi, J.S., Cox, M.A., and Zajac, A.J. (2010). T-cell exhaustion: characteristics, causes and  
984 conversion. *Immunology* *129*, 474-481. [10.1111/j.1365-2567.2010.03255.x](https://doi.org/10.1111/j.1365-2567.2010.03255.x).
- 985 Yoshiyama, Y., Higuchi, M., Zhang, B., Huang, S.M., Iwata, N., Saido, T.C., Maeda, J.,  
986 Suhara, T., Trojanowski, J.Q., and Lee, V.M. (2007). Synapse loss and microglial  
987 activation precede tangles in a P301S tauopathy mouse model. *Neuron* *53*, 337-351.  
988 [10.1016/j.neuron.2007.01.010](https://doi.org/10.1016/j.neuron.2007.01.010).
- 989 Zarrin, A.A., Bao, K., Lupardus, P., and Vucic, D. (2021). Kinase inhibition in  
990 autoimmunity and inflammation. *Nat Rev Drug Discov* *20*, 39-63. [10.1038/s41573-020-0082-8](https://doi.org/10.1038/s41573-020-0082-8).
- 992 Zeisel, A., Hochgerner, H., Lonnerberg, P., Johnsson, A., Memic, F., van der Zwan, J.,  
993 Haring, M., Braun, E., Borm, L.E., La Manno, G., et al. (2018). Molecular Architecture  
994 of the Mouse Nervous System. *Cell* *174*, 999-1014 e1022.  
995 [10.1016/j.cell.2018.06.021](https://doi.org/10.1016/j.cell.2018.06.021).
- 996 Zhang, Y., Chen, K., Sloan, S.A., Bennett, M.L., Scholze, A.R., O'Keeffe, S., Phatnani, H.P.,  
997 Guarnieri, P., Caneda, C., Ruderisch, N., et al. (2014). An RNA-sequencing

998 transcriptome and splicing database of glia, neurons, and vascular cells of the  
999 cerebral cortex. *J Neurosci* *34*, 11929-11947. [10.1523/JNEUROSCI.1860-14.2014](https://doi.org/10.1523/JNEUROSCI.1860-14.2014).  
1000 Zhou, M., Xu, R., Kaelber, D.C., and Gurney, M.E. (2020). Tumor Necrosis Factor  
1001 (TNF) blocking agents are associated with lower risk for Alzheimer's disease in  
1002 patients with rheumatoid arthritis and psoriasis. *PLoS One* *15*, e0229819.  
1003 [10.1371/journal.pone.0229819](https://doi.org/10.1371/journal.pone.0229819).  
1004  
1005  
1006  
1007  
1008  
1009  
1010  
1011  
1012  
1013  
1014  
1015  
1016  
1017  
1018  
1019  
1020  
1021  
1022  
1023  
1024  
1025  
1026  
1027  
1028  
1029

Fig. 1

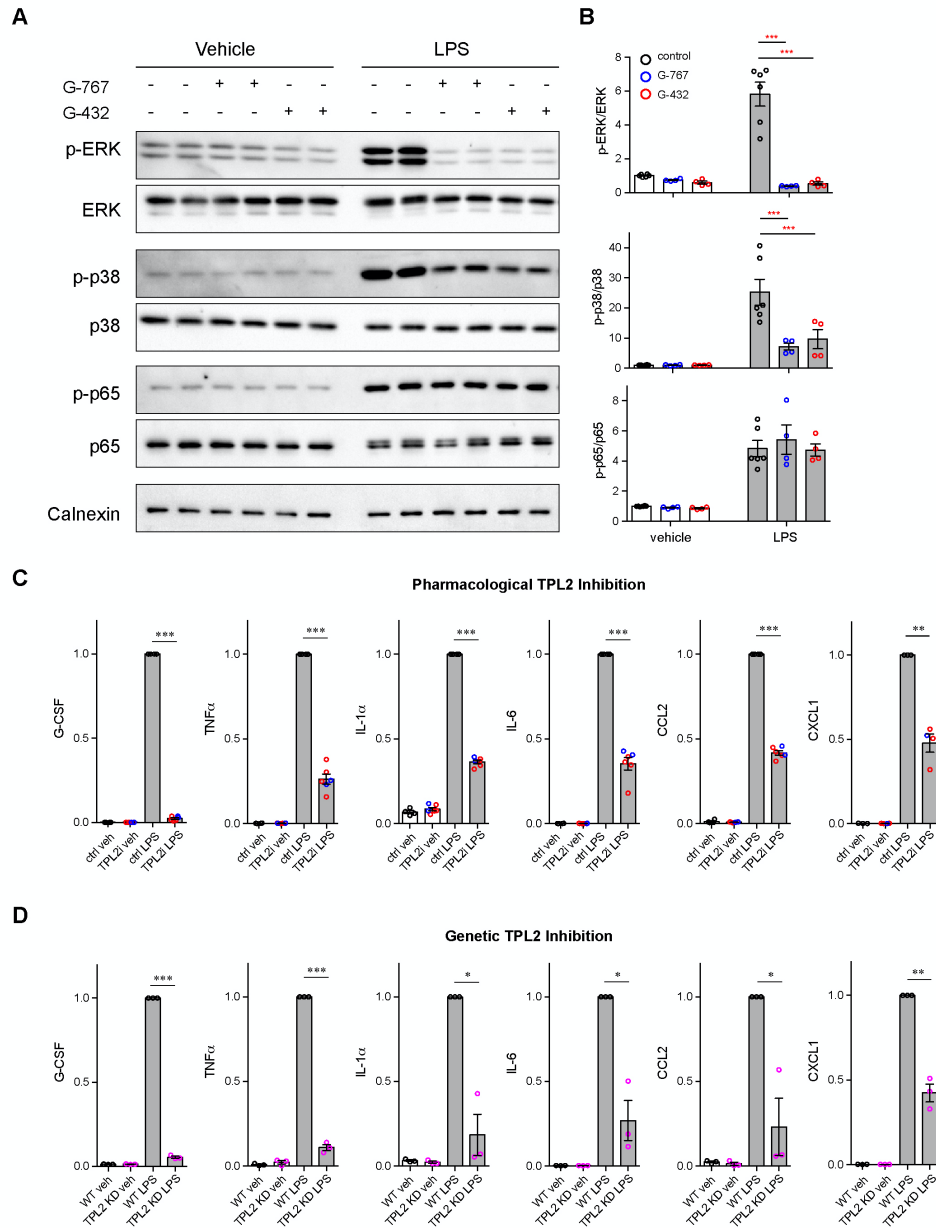

1030

1031

1032

1033

1034

1035 **Fig. 1. TPL2 modulates MAPK signaling and cytokine production by microglia.**

1036 **A**, Representative western blots of phospho-ERK, total ERK, phospho-p38, total p38, phospho-  
1037 p65, total p65 and Calnexin (loading control) in lysates from primary microglia cultures treated  
1038 with vehicle or LPS with or without TPL2 inhibitors (2  $\mu$ M). **B**, Quantification of western blot data  
1039 as shown in **(A)**. Phosphorylated proteins were first normalized to the corresponding total proteins,  
1040 and then the normalized values were plotted relative to the average values from control samples  
1041 (no LPS, no TPL2 inhibitor) n = 4-6. Data are represented by mean  $\pm$  SEM. \*\*\*, p < 0.001, two-  
1042 way ANOVA with Tukey's multiple comparisons test. **C** and **D**, Quantification of cytokine  
1043 measurements from the supernatants of WT primary microglia with or without TPL2 inhibitor **(C)**  
1044 or microglia isolated from WT mice or TPL2KD mice **(D)** under control or LPS induction (24 hr  
1045 incubation) conditions. Cytokines highlighted here were selected based on significant LPS  
1046 induction that was reduced by TPL2 inhibition (pharmacological or genetic) by > 50%. Additional  
1047 cytokine measurements are provided in Fig. S2. Cytokine measurements were normalized to  
1048 average values of WT microglia treated with LPS. Data from TPL2 inhibitor G-432 (red circle) and  
1049 G-767 (blue circle) were combined in (c), n = 4-6. n = 3 for (d). Data are represented by mean  $\pm$ -  
1050 SEM. \*, p < 0.05, \*\*, p < 0.01, \*\*\*, p < 0.001, one-way ANOVA with Tukey's multiple  
1051 comparisons test.

1052

1053 Fig.1-source data: full images of Fig. 1A western blots are available.

1054

1055

1056

1057

1058

Fig. 2

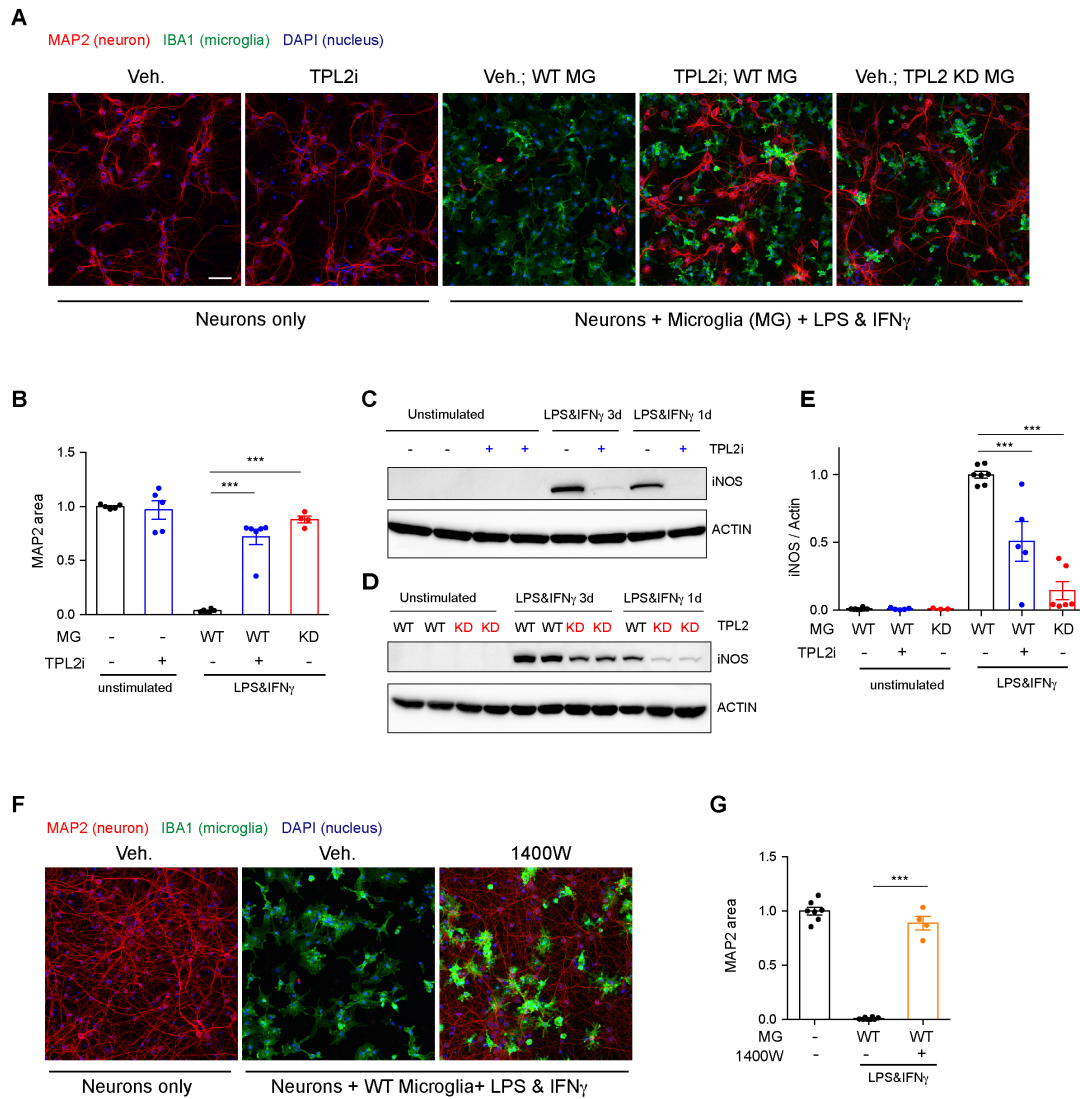

1059  
1060  
1061  
1062  
1063



1064 **Fig. 2. TPL2 inhibition rescues neurodegeneration in a co-culture model.**

1065 **A**, Representative images of immunostaining for MAP2 (red), IBA1 (green) and DAPI (blue) in  
1066 mouse cortical neuronal cultures or mouse cortical neurons co-cultured with mouse microglia as  
1067 indicated. Cell number ratio in co-cultures is 1:1. Neurons were always cultured from WT mice  
1068 and microglia were either from WT mice or TPL2KD mice as indicated. **B**, Quantification of MAP2  
1069 staining positive area within the image field as a readout of surviving neurons in the culture. MAP2  
1070 area is shown as normalized relative to the average value of the control condition (no microglia, no  
1071 stimulation). n = 5-6 per condition. **C** and **D**, Representative immunoblots of iNOS (inducible nitric  
1072 oxide synthase) from primary microglia cultures with treatments as indicated. Comparison was  
1073 done either between WT microglia treated with and without TPL2 inhibitor (**C**), or between  
1074 microglia isolated from WT mice and TPL2KD mice (**D**). **e**, Quantification of western blot data in  
1075 (**D**) and (**D**). iNOS signal was normalized to actin signal, and the normalized values were plotted  
1076 relative to the average value of the lysates from WT microglia treated with LPS and interferon  
1077 gamma. n = 3-8. **F**, Representative images of immunostaining of MAP2 (red), IBA1 (green) and  
1078 DAPI (blue) in mouse cortical neuronal cultures or mouse cortical neurons co-cultured with mouse  
1079 microglia as indicated. Cell number ratio in co-cultures is 1:1. **G**, Quantification of MAP2 staining  
1080 is shown as in (**B**). n = 4-8. For all bar graphs, data are represented by mean +/- SEM. \*\*\*, p <  
1081 0.001, one-way ANOVA with Tukey's multiple comparisons test.

1082

1083 Fig.2-source data: full images of Fig. 2C and 2D western blots are available.

1084

1085

1086

Fig. 3

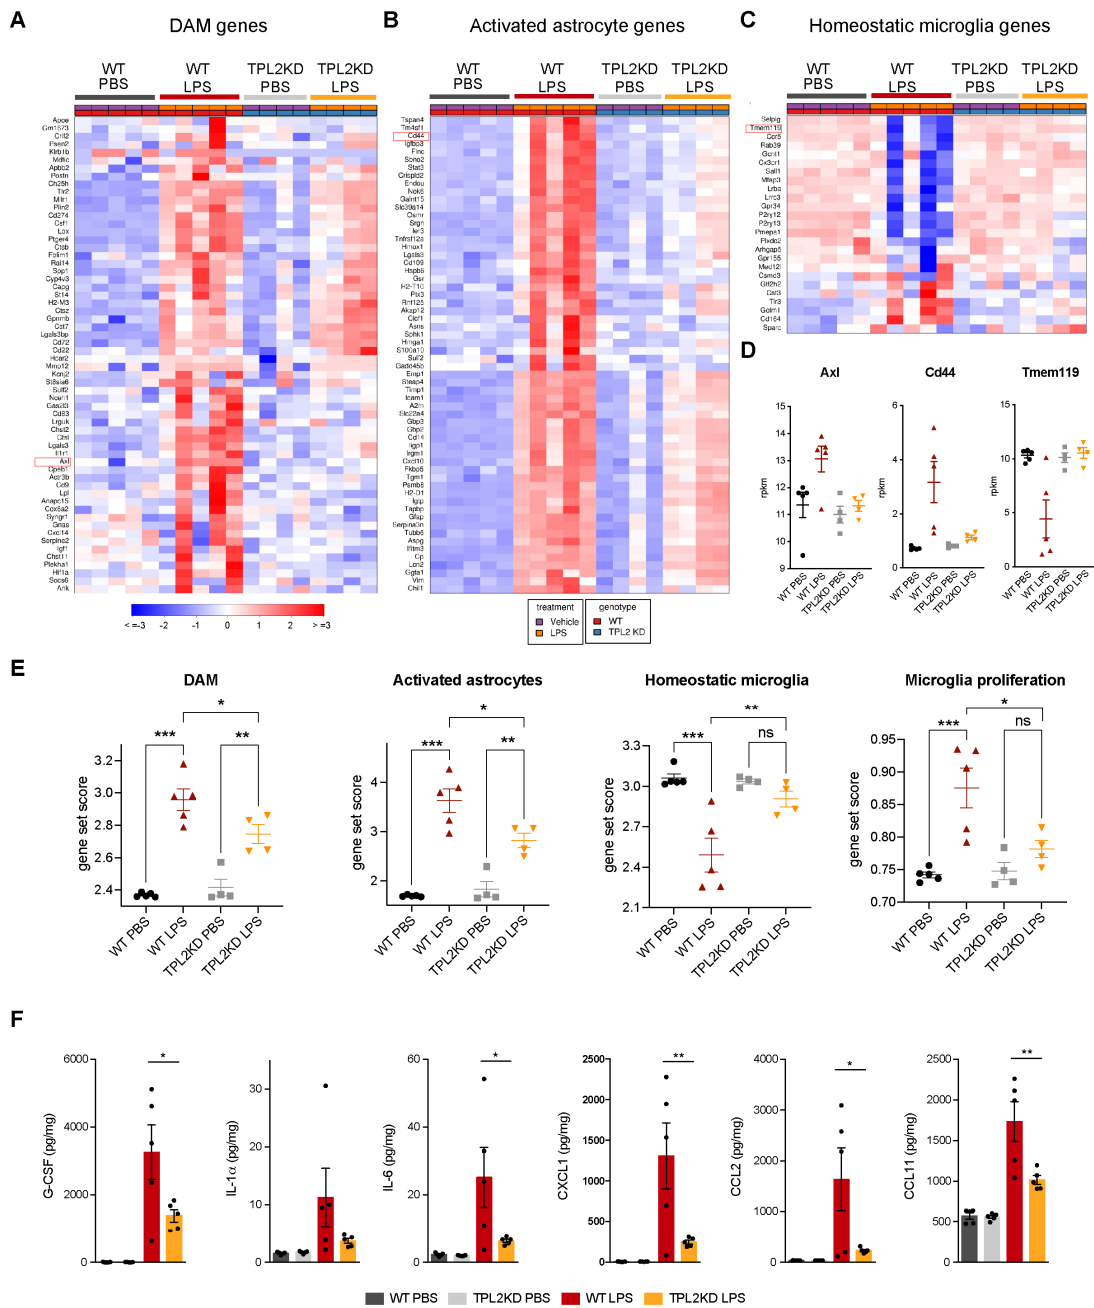

1087  
1088  
1089  
1090

1091 **Fig. 3. TPL2KD mice have attenuated gene expression changes and cytokine/chemokine**  
1092 **response after LPS injection.**

1093 **A**, Heatmap showing z scores of the top 60 DAM genes (disease associated microglia genes) in the  
1094 brains of WT or TPL2KD mice injected with PBS or LPS. The top 60 DAM genes were taken from  
1095 the list in(Friedman *et al.*, 2018), and were selected based on the ranking of z scores of these genes  
1096 in WT mice injected with LPS. **B**, Heatmap showing z scores of the top 60 activated astrocyte genes  
1097 taken from the list in(Wu *et al.*, 2019) (both A1 and A2 astrocyte genes were included). The top 60  
1098 genes were also selected based on the ranking of z-scores of these genes in WT mice injected with  
1099 LPS. **C**, Heatmap showing z-scores of homeostatic microglia genes from(Friedman *et al.*, 2018).  
1100 **D**, Examples of DAM genes (*Axl*), astrocyte activated genes (*Cd44*) and homeostatic microglia  
1101 genes (*Tmem119*). **E**, Geneset score expression of DAM genes, activated astrocyte genes,  
1102 homeostatic microglia genes and microglia proliferation genes in mouse brain samples with  
1103 different treatments as indicated. n = 4-5 animals per condition. **F**, Cytokine and chemokine levels  
1104 in mouse brain lysates from the same mice as in (**A** - **E**) measured using a bead-based multiplex  
1105 assay. Cytokine levels were normalized to total protein concentration in brain lysates and are shown  
1106 as pg/mg. Only analytes that were above the detection level, changed after LPS injection, and  
1107 exhibited a difference between WT and TPL2KD mice are shown. Data are represented by mean +/-  
1108 SEM. \*, p < 0.05, \*\*, p < 0.01, \*\*\*, p < 0.001, one-way ANOVA with Tukey's multiple  
1109 comparisons test.

1110

1111

1112

Fig. 4

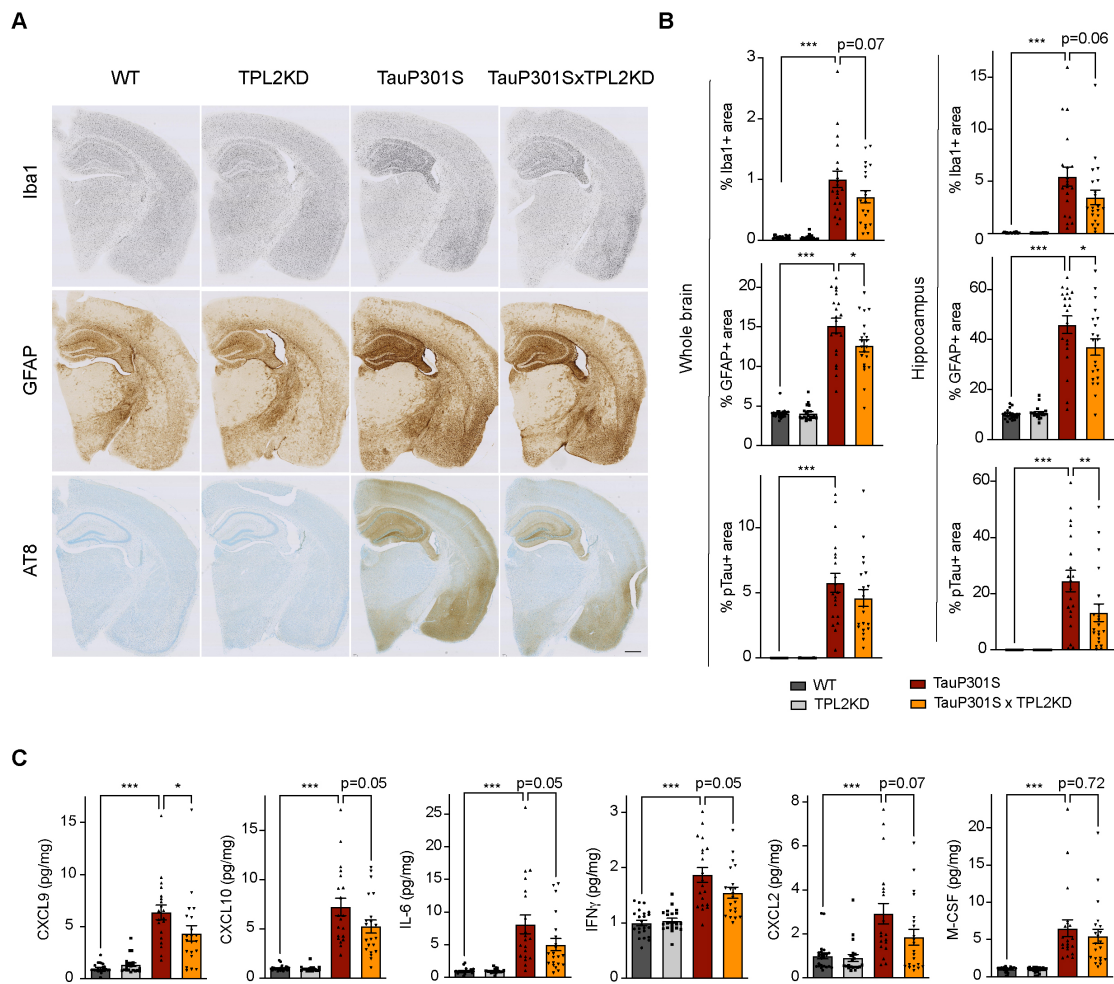

1113

1114

1115

1116

1117

1118 **Fig. 4. TPL2KD partially rescues neuroinflammation in TauP301S mouse brain.**

1119 **A**, Representative images showing immunostaining for Iba1, GFAP and AT8 in mouse hemibrains  
1120 from 9-month-old male mice with genotypes as indicated. Scale bar, 500  $\mu\text{m}$ . **B**, Quantification of  
1121 percentage of Iba1, GFAP, AT8 positive area within mouse hemibrains and specifically within the  
1122 hippocampus as indicated. Analysis shown are combined data from 9-month-old male mice and  
1123 11-month-old female mice. Each dot represents one animal. **C**, A subset of cytokines or chemokine  
1124 levels in mouse hippocampal lysates measured using bead-based mouse cytokine multiplex assay.  
1125 Cytokine levels were normalized to total protein concentration in brain lysates and are shown as  
1126 pg/mg. Data shown include protein levels from both 9-month-old male mice and 11-month-old  
1127 female mice. For all bar graphs, data are represented by mean  $\pm$  SEM. \*,  $p < 0.05$ , \*\*\*,  $p < 0.001$ ,  
1128 one-way ANOVA with Tukey's multiple comparisons test.

1129

1130

1131

1132

1133

1134

1135

1136

1137

1138

1139

1140

1141

1142

1143

1144

1145

1146

Fig. 5

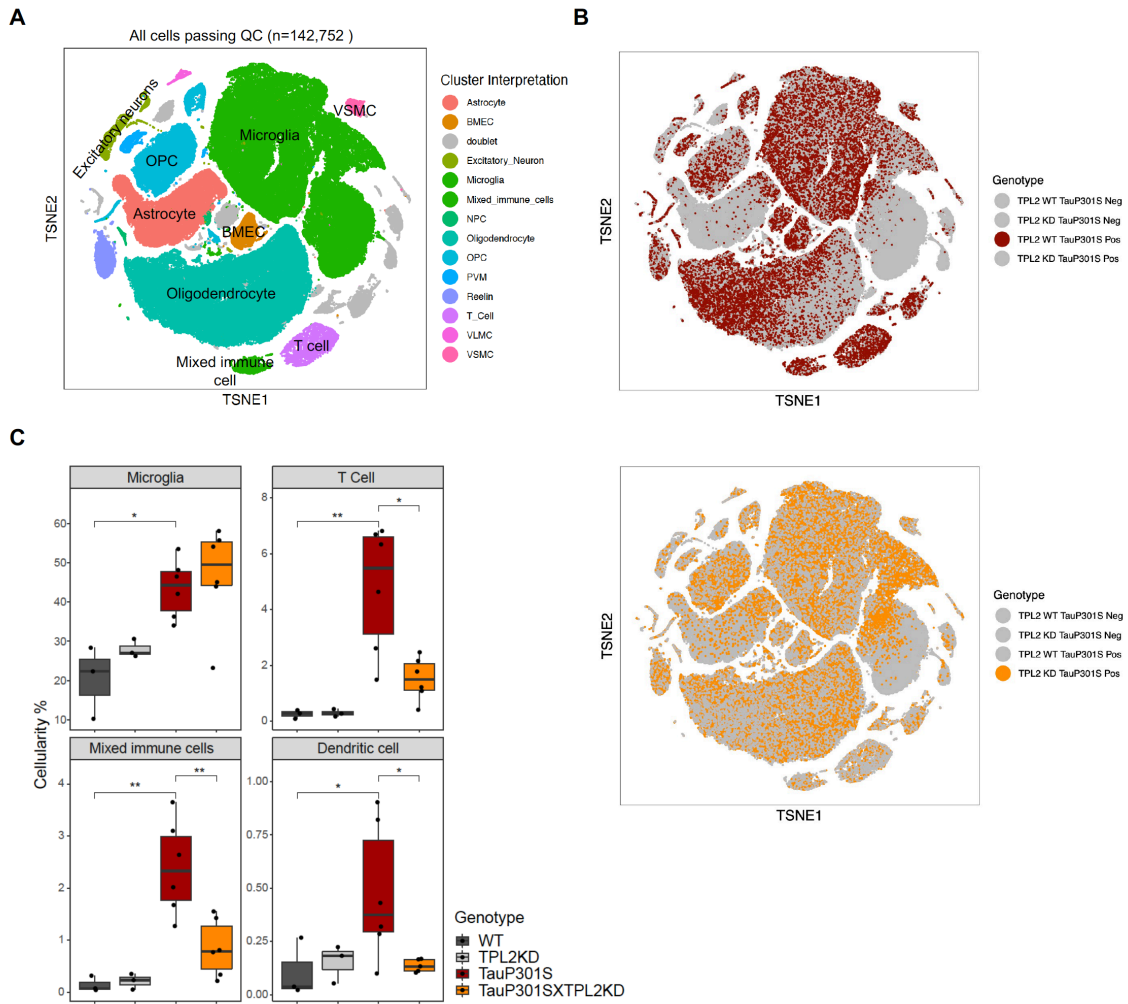

1147

1148

1149

1150

1151

1152

1153

1154

1155

1156

1157

1158

1159

1160 **Fig. 5. Single-cell RNA-seq shows TPL2KD normalizes increased T cells and dendritic cells**  
1161 **in TauP301S brains.**

1162 **A**, tSNE dimensional reduction and cell type interpretation of 142,752 hippocampal cells from 9-  
1163 month-old TPL2 WT/KD TauP301S positive/negative mice. **B**, Distribution of cells by TPL2  
1164 genotype in TauP301S Positive samples. **C**, “Cellularity plot” illustrating proportions of microglia,  
1165 mixed immune cells, T cells, and dendritic cells (as identified from further analysis of the mixed  
1166 immune cell cluster described in supplementary Fig. S8) in each genotype. Each point represents a  
1167 single animal, and the y-axis is the percentage of all cells in the scRNA-Seq dataset for that animal  
1168 of the given cell type. Boxplots showing summarized distribution of the percentage; P values are  
1169 based on t-test between indicated groups using [ggpubr](#). \*,  $p < 0.05$ , \*\*,  $p < 0.01$ .

1170  
1171  
1172  
1173  
1174

Fig. 6

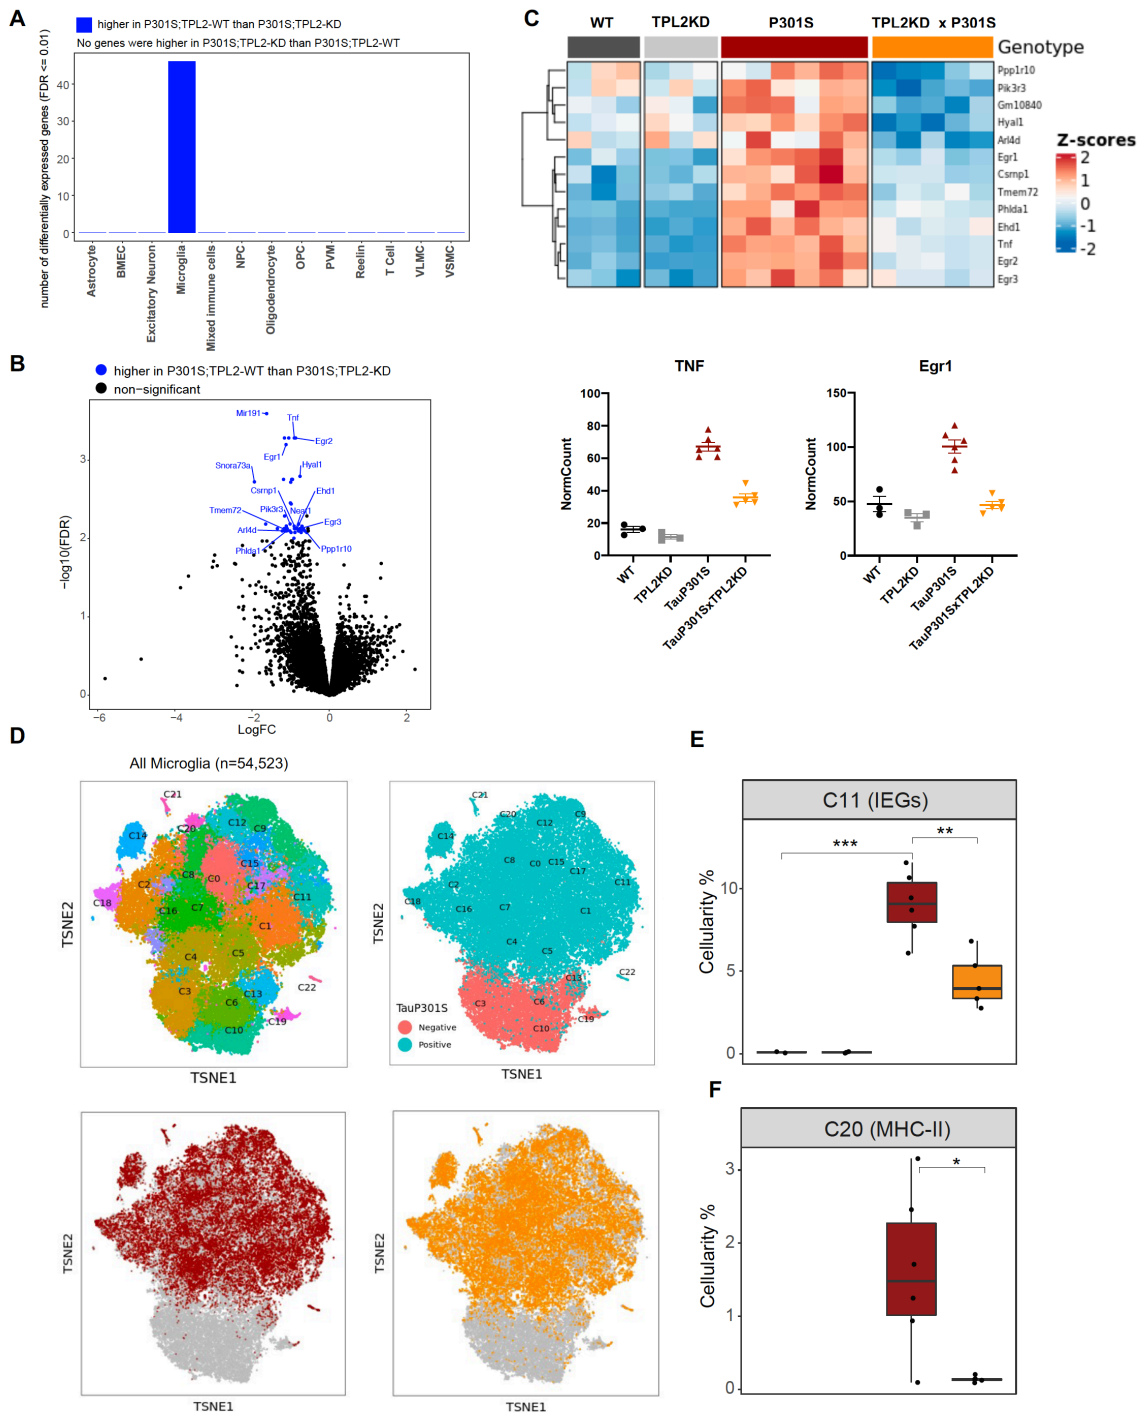

1175

1176

1177

1178



1179 **Fig. 6. TPL2KD partially normalizes elevated gene expression in TauP301S microglia and**  
1180 **reduces the abundance of microglia in specific P301S-induced clusters.**

1181 **A**, Number of significantly differentially expressed genes (DEGs) for each cell type from  
1182 pseudobulk analysis at FDR < 0.01 and Log<sub>2</sub>(fold-change) > 1.5 or < -1.5 between P301S and  
1183 P301S;TPL2KD genotypes. **B**, Volcano plot showing differentially expressed genes for microglia  
1184 from pseudobulk analysis between P301S and P301S;TPL2KD genotypes. Only protein-coding  
1185 genes were annotated. **C**, Heatmap showing z-scores of Log<sub>2</sub>(normCount+1) for microglia DEGs  
1186 as shown in **(B)**. Boxplots summarizing expression levels of selected genes from the heatmap using  
1187 normalized counts across the 4 genotypes used in this study. **D**, tSNE-based subclustering of n =  
1188 54,523 microglia defined from Fig. 5A, colored by subcluster identity and genotypes. **E** and **F**,  
1189 Cellularity plot, similar to Fig. 5C, showing for each sample the percentage of microglia in  
1190 subclusters C11 or C20 as a percentage of the total number of microglia cells in that sample.  
1191 P values are based on t-test between indicated groups. \*, p < 0.05, \*\*, p < 0.01.

Fig. 7

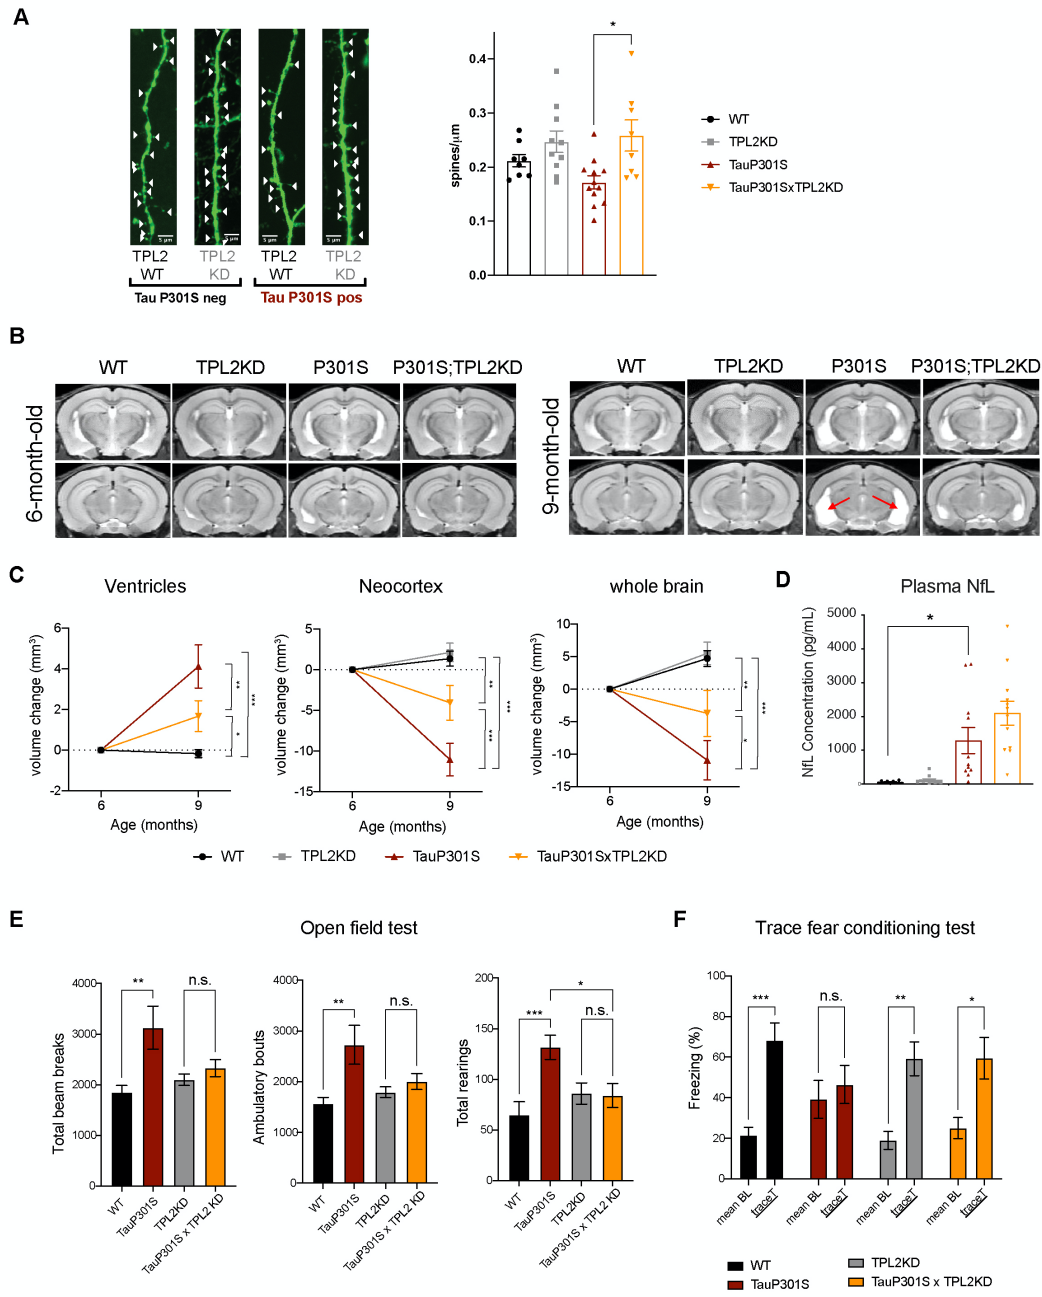

1192

1193

1194

1195

1196

1197 **Fig. 7. TPL2 functional deficiency attenuates brain atrophy and recues behavioral deficits in**  
1198 **TauP301S mice**

1199 **A**, Ex vivo imaging of fixed mouse hemibrains of 9-month-old male mice. Representative confocal  
1200 z-stack images of GFP-expressing neurons are shown on the left with genotypes as indicated. White  
1201 arrow heads point to the dendritic spines. Scale bar, 5  $\mu$ m. Right, quantification of spine density as  
1202 shown on the left. Each dot represents one mouse (average of 6 dendrites). n = 8-12. Data are  
1203 represented by mean  $\pm$  SEM. \*, p < 0.05, one-way ANOVA with Tukey's multiple comparisons  
1204 test. **B**, Representative volumetric MRI images in 6-month-old and 9-month-old male mice with  
1205 genotypes as indicated. Arrow indicates enlargement of ventricles at 9 months of age compared  
1206 with 6 months in P301S mice. **C**, Longitudinal volumetric MRI quantification shows volume  
1207 changes of ventricles, neocortex and whole brain at 9 months of age compared with 6 months of  
1208 age. Comparisons between all four genotypes at 9 months of age showed significant increase of  
1209 ventricle volumes and decrease of neocortex and whole brain volumes in TauP301S mice and  
1210 TPLKD showed partial rescue of the TauP301S dependent volume changes. n = 11-12 male mice  
1211 per genotype. Data are represented by mean  $\pm$  SEM. \*, p < 0.05, \*\*, p < 0.01, \*\*\*, p < 0.001,  
1212 two-way ANOVA with Tukey's multiple comparisons test. **D**, Quantification of plasma NFL levels  
1213 from mice in (c). **E**, Spontaneous locomotor activity of mice were evaluated in open field tests  
1214 including total beam breaks, ambulatory bouts and total rearings during a 20 min period. TauP301S  
1215 mice showed hyperactivity, which was rescued by TPL2KD. n = 22-24 animals per genotype with  
1216 male and female mice combined. \*, p < 0.05, \*\*, p < 0.01, \*\*\*, p < 0.001, one-way ANOVA with  
1217 Tukey's multiple comparisons test. **F**, Memory of mice was evaluated using trace fear conditioning  
1218 test. Percentage of time freezing during baseline recording time and during the trace interval time  
1219 after the conditioned stimulus tone was compared for each genotype. n = 10-12 animals per  
1220 genotype. Data are represented by mean  $\pm$  SEM. \*, p < 0.05, \*\*, p < 0.01, \*\*\*, p < 0.001, two-  
1221 way ANOVA with Bonferroni's multiple comparisons test.

1222 Supplementary Figures (S1-S12)  
1223

Fig. S1

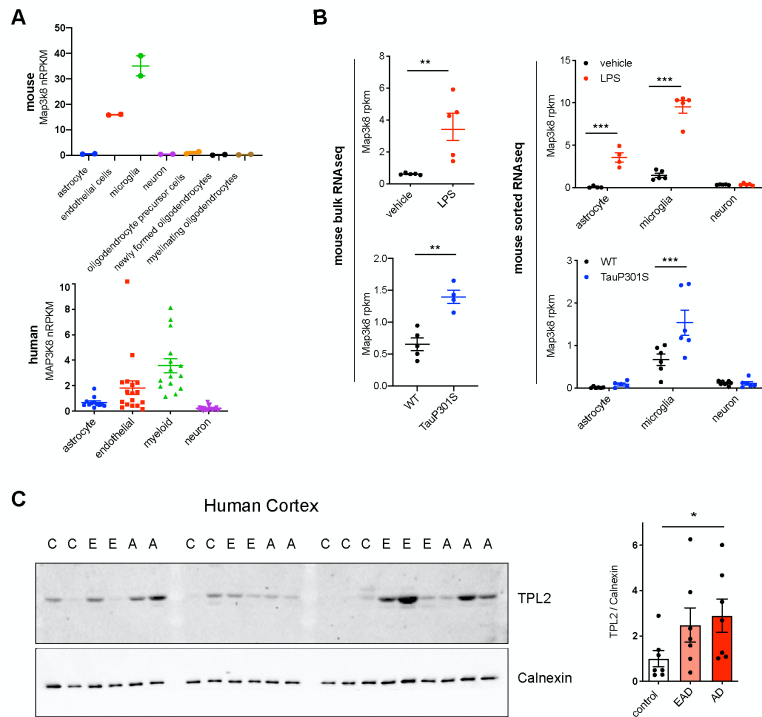

1224  
1225  
1226

**Fig. S1. TPL2 is upregulated in Tauopathy mice and AD patients.**

1227 **A**, Expression of TPL2 (Map3k8) in various cell types, as indicated, sorted from mouse brain tissue  
1228 (Zhang *et al.*, 2014) (top) or human brain tissue (Srinivasan *et al.*, 2020) (bottom). **B**, Expression  
1229 of TPL2 in brain bulk tissue (top left; GSE196401) or sorted astrocytes, microglia and neurons (top  
1230 right (Srinivasan *et al.*, 2016)) from WT mice injected with PBS or LPS (10 mg/kg). n = 4-5.  
1231 Expression of TPL2 was also examined in hippocampal bulk tissue (bottom left; GSE186414) or  
1232 sorted astrocytes, microglia and neurons (bottom right (Friedman *et al.*, 2018)) from hippocampi  
1233 of WT and TauP301S mice. **C**, Western blot image and quantification of TPL2 and calnexin as a  
1234 loading control in lysates from human superior frontal gyrus of healthy control (C), early AD (E or  
1235 EAD) and AD (A or AD) patient brains. TPL2 protein levels were normalized to the average control  
1236 level after normalization to Calnexin. Data are represented by mean +/- SEM. \*, p < 0.05, two-  
1237 tailed Student's t-test.

1238 Supplementary Fig.S1-source data: full images of Fig. S1C western blots are available.

1239 Fig. S2

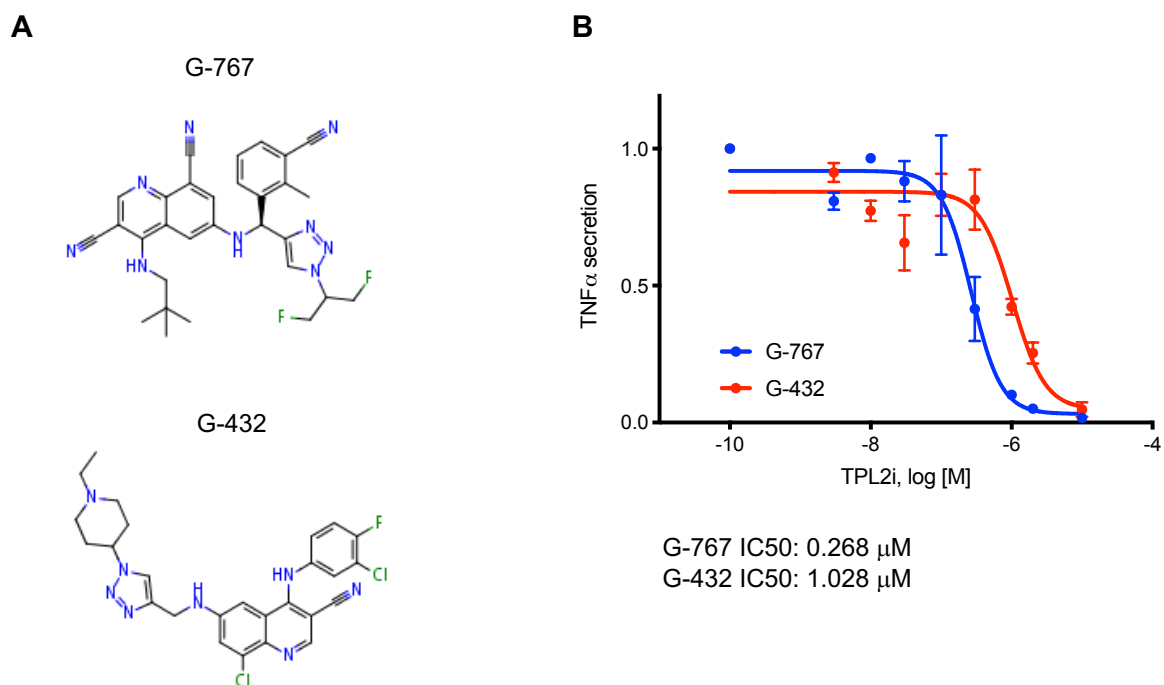

1240

1241

1242 **Fig. S2. TPL2 inhibitor structures and potency dose response curves.**

1243 **A**, Structures of TPL2 inhibitors G-432 and G-767. **B**, Inhibition dose response curve of TPL2  
1244 inhibitor G-432 or G-767. Measurements were done with primary microglia cultures stimulated  
1245 with LPS, using TNF $\alpha$  levels in the cell culture supernatants as the readout. TNF $\alpha$  levels were  
1246 normalized to average values of microglia treated with LPS, without inhibitor.

1247

1248

1249

1250

1251

1252

Fig. S3

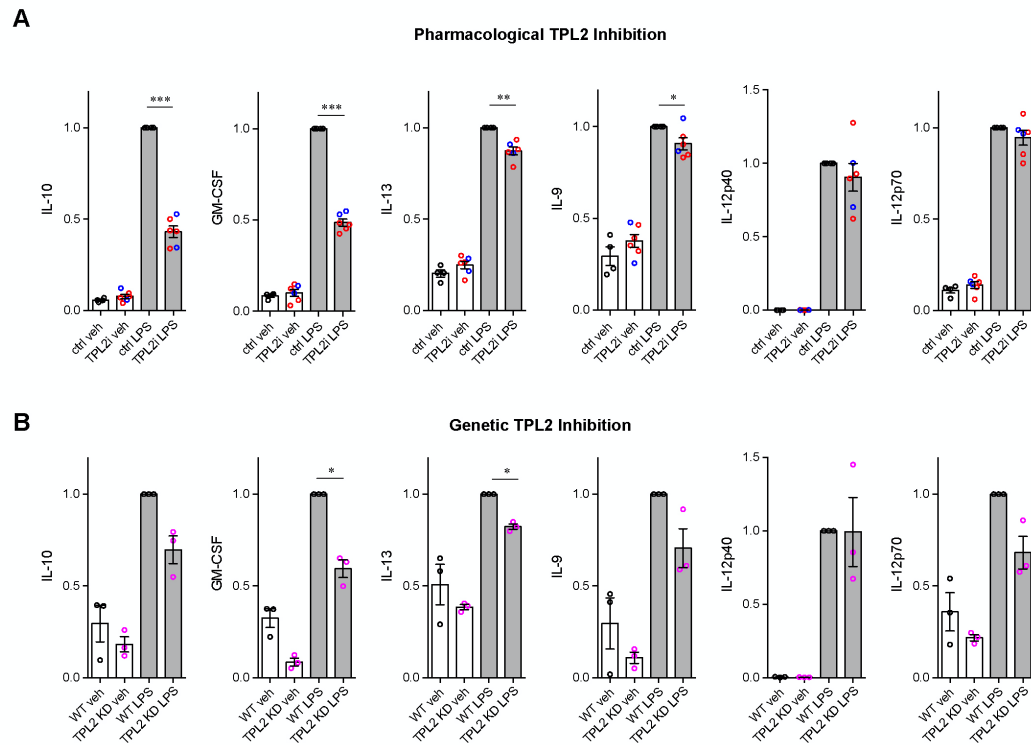

1253

1254

1255 **Fig. S3. Cytokine and chemokine release by microglia after LPS stimulation. Related to Fig.**

1256 **1.**

1257 Additional cytokine and chemokine measurements from the same samples as shown in Fig. 1C,D

1258 are shown here. Cytokine and chemokine levels from the supernatants of WT primary microglia

1259 with or without TPL2 inhibitor (**A**) or microglia isolated from WT mice or TPL2KD mice (**B**) under

1260 control or LPS induction (24 hr incubation) conditions as indicated. Data are represented by

1261 mean +/- SEM. \*,  $p < 0.05$ , \*\*,  $p < 0.01$ , \*\*\*,  $p < 0.001$ , one-way ANOVA with Tukey's multiple

1262 comparisons test.

1263

1264

1265

Fig. S4

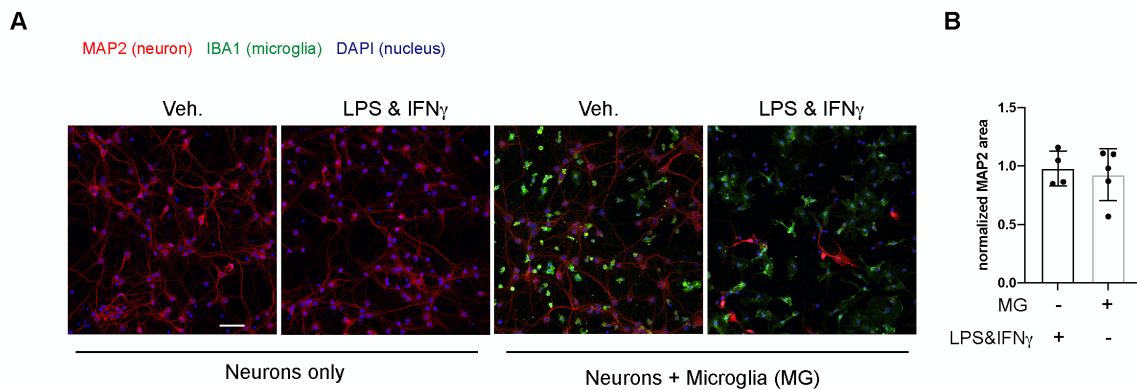

1266

1267

1268 **Fig. S4. Stimulation of neurons cultured without microglia or co-culture of neurons and**  
1269 **microglia without stimulation does not result in neuronal loss.**

1270 **A**, Representative images of immunostaining of MAP2 (red), IBA1 (green) and DAPI (blue) in  
1271 mouse cortical neuronal cultures or mouse cortical neurons co-cultured with mouse microglia as  
1272 indicated. Cell number ratio in co-cultures is 1:1. Neurons and microglia were both cultured from  
1273 WT mice. **B**, Quantification of MAP2 staining positive area within the image field as readouts of  
1274 surviving neurons in the culture. MAP2 areas are shown as normalized relative to the average value  
1275 of control condition (no microglia, no stimulation). n = 4-5 per condition.

1276

1277

1278

1279

1280

1281

1282

1283

1284

Fig. S5

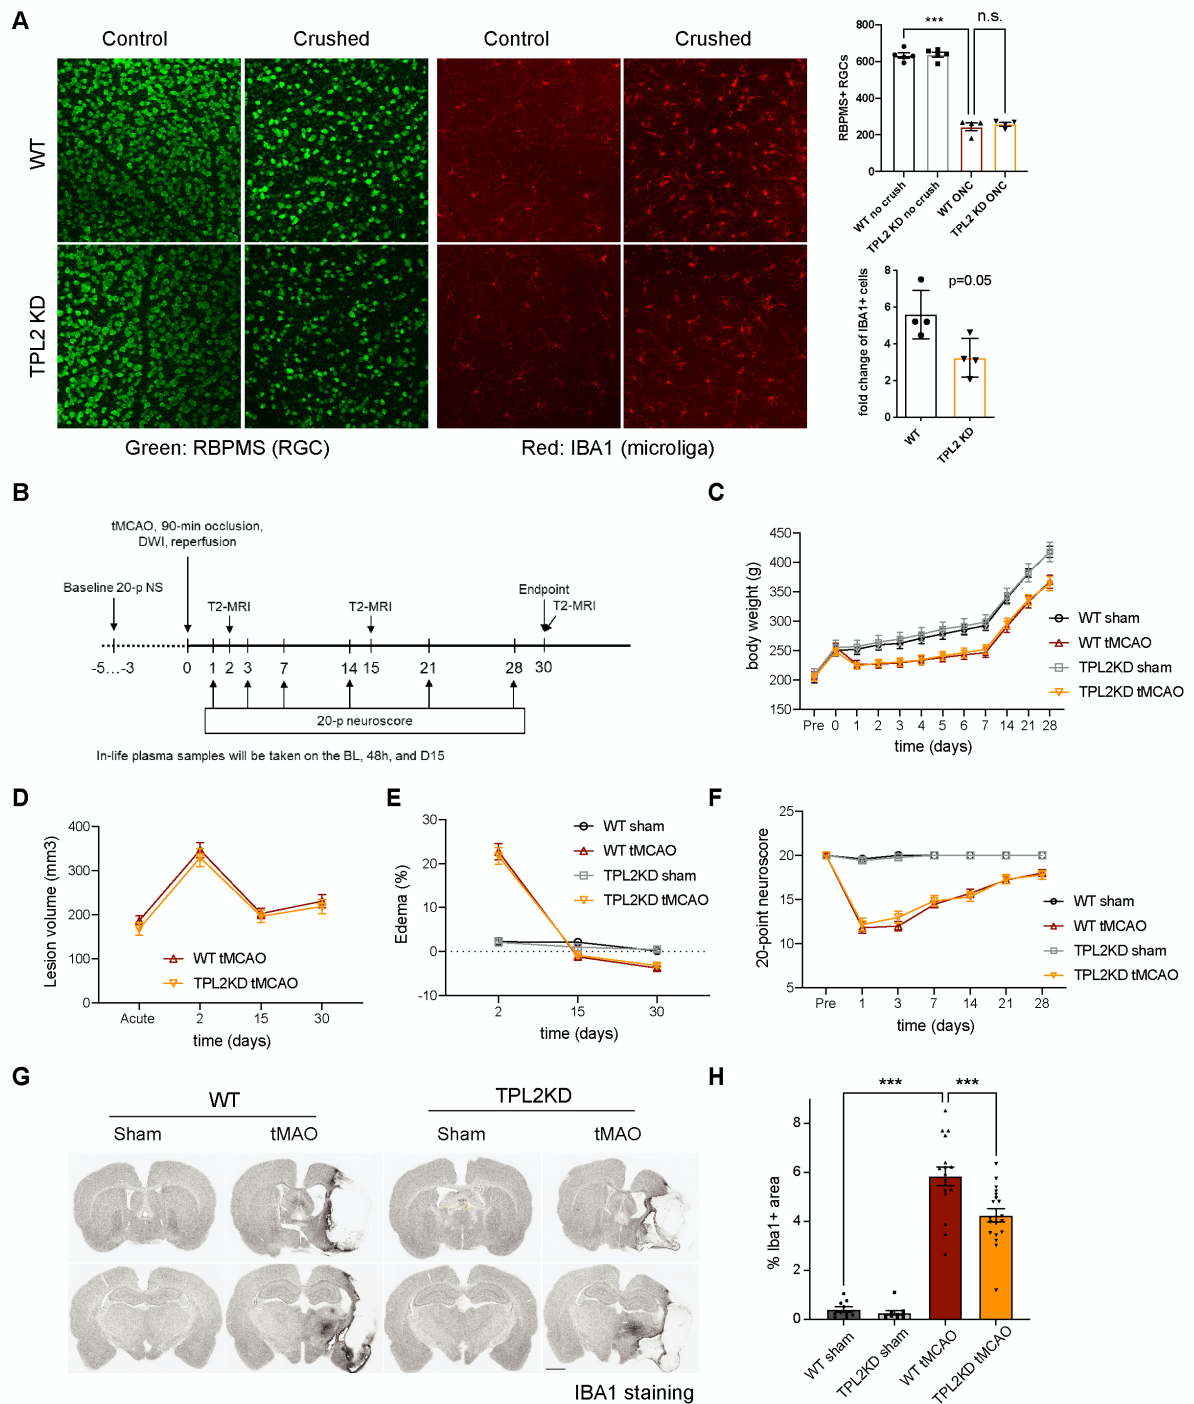

1285

1286



1287 **Fig. S5. Effect of TPL2KD in acute injury models: optic nerve crush and stroke.**

1288 **A**, *Left*, representative images of whole mount retina stained with RBPMS (green) for retinal  
1289 ganglion cells (RGCs) and IBA1 (red) for microglia/macrophages from control eye or optic nerve  
1290 crushed (ONC) eye of WT or TPL2KD mice as indicated. *Top Right*, quantification of the cell  
1291 number of RGCs. *Bottom right*, quantification of the ratio of Iba1 positive cell number in the ONC  
1292 eye relative the control eye of the same mouse. Each dot represents one mouse. Data are represented  
1293 by mean +/- SEM. \*\*\*,  $p < 0.001$ , one-way ANOVA with Tukey's multiple comparisons test. **B**,  
1294 Experimental design of rat tMAO study. **C**, Bodyweight measurements of WT and TPL2KD rats  
1295 after sham or tMAO surgery at multiple timepoints as indicated. **D**, Quantification of lesion volume  
1296 based on volumetric analysis of T2-relaxation time analysis from T2- MRI of WT or TPL2KD rats  
1297 after tMAO surgery. **E**, Quantification of percentage of tissue area with Edema from T2-MRI of  
1298 WT or TPL2KD rats after sham or tMAO surgery. **F**, Behavioral analysis of WT or TPL2KD rats  
1299 after sham or tMAO surgery as indicated using 20-point neuroscore measurement. **G**,  
1300 Representative images of Iba1 staining in WT and TPL2KD rats 30 days post-sham or -tMAO as  
1301 indicated. Scale bar, 2 mm. **H**, Quantification of percentage of tissue area that are positive for Iba1  
1302 staining in the ipsilateral side of the rat brains. One mouse brain was excluded as outlier based on  
1303 Grubb's test. Data are represented by mean +/- SEM.  $n = 10$  for WT sham,  $n = 17$  for WT tMAO,  
1304  $n = 9$  for TPL2KD sham,  $n = 19$  for TPL2KD tMAO. \*\*\*,  $p < 0.001$ , one-way ANOVA with  
1305 Tukey's multiple comparisons test.

1306

1307

1308

1309

1310

1311

1312 Fig. S6

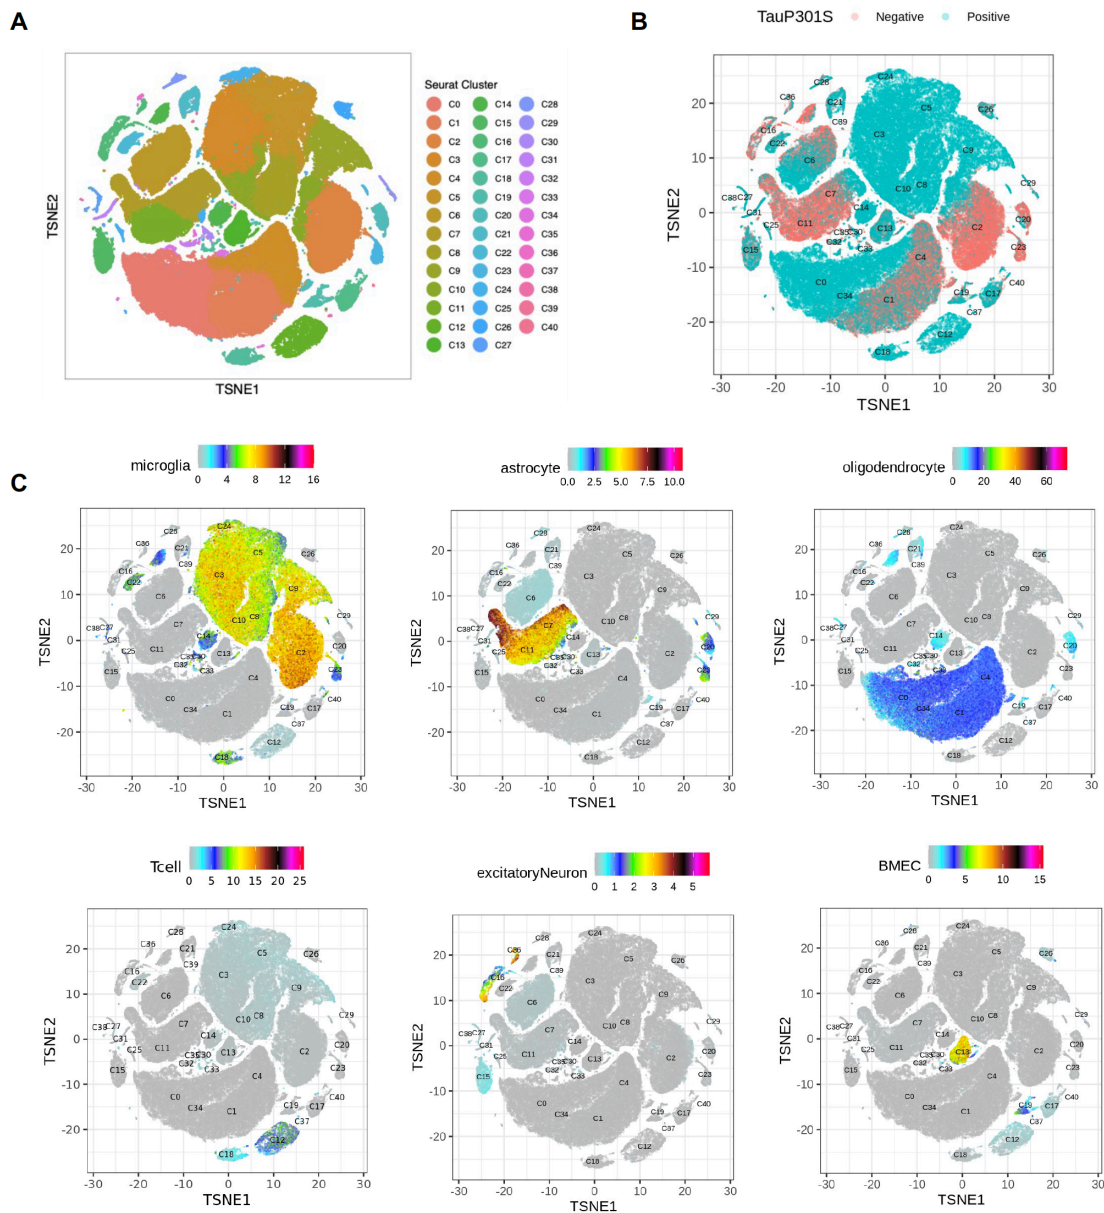

1313

1314 **Fig. S6: Dimensional reduction and interpretation of cell clusters by gene set scores (related**  
1315 **to Figure 5).**

1316 **A**, tSNE dimensional reduction and cell type interpretation of 142,752 hippocampal cells from 9-  
1317 month-old TPL2 WT/KD TauP301S positive/negative mice. **B**, Distribution of cells by TauP301S  
1318 phenotype. **C**, tSNE plots of gene sets marking specific cell type populations based on cell type  
1319 specific markers from (Lee *et al.*, 2021b). Gene sets can be found in Table S1.

1320 Fig. S7

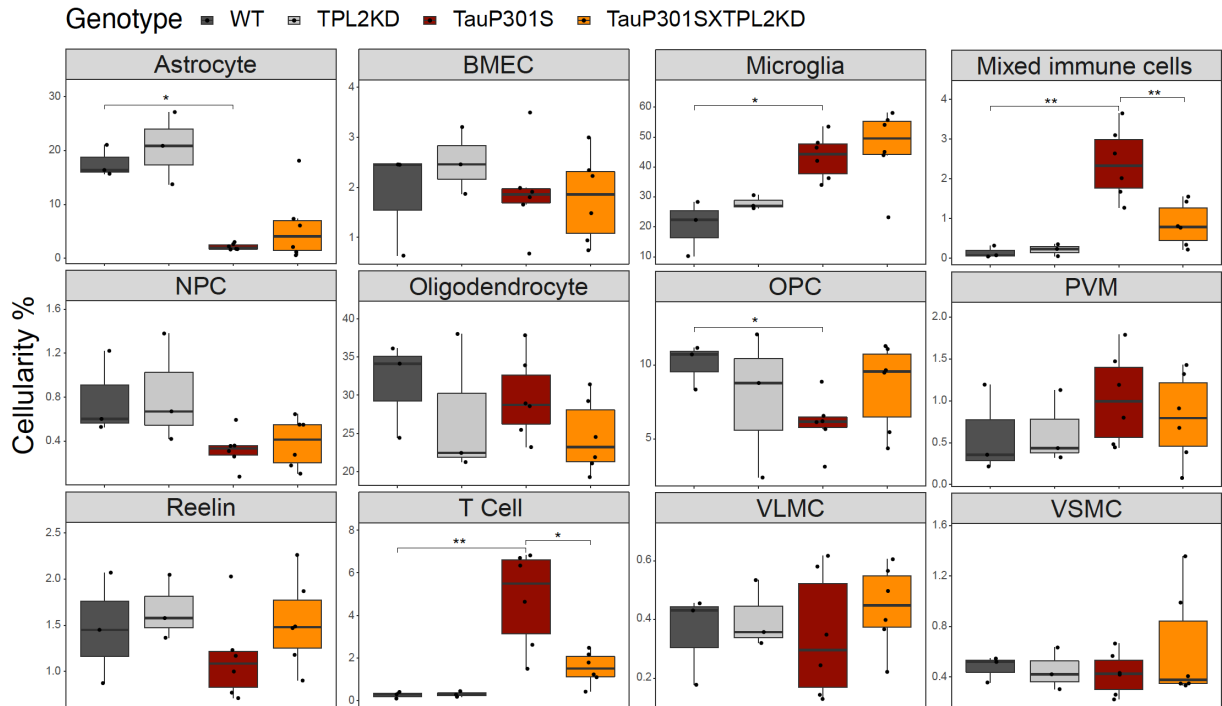

1321

1322

1323 **Fig. S7. Cellularity plot for all initially annotated cell types.**

1324 The percentage of cells in each cell type from Fig. 5A as percentage of the total number of cells

1325 within each sample (each dot is a sample). P values are based on t-test between indicated groups.

1326 \*,  $p < 0.05$ , \*\*,  $p < 0.01$ .

1327

1328

1329

1330

1331

1332

1333

1334

1335 Fig. S8

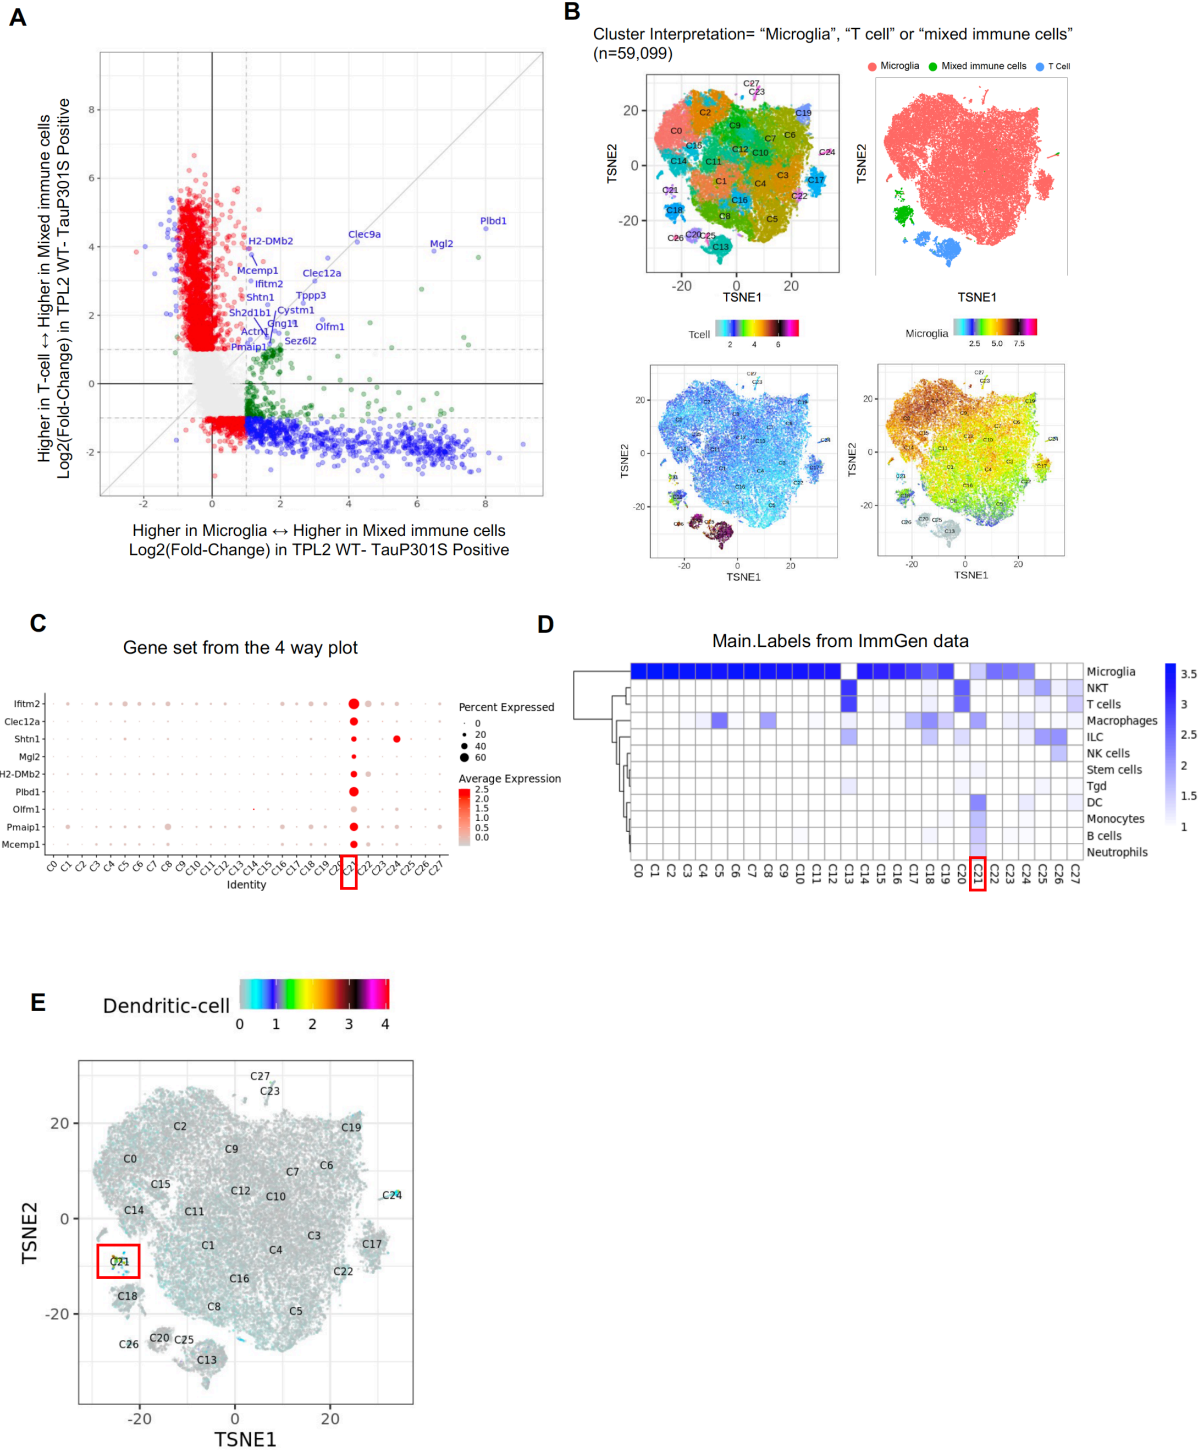

1336

1337

1338

1339 **Fig. S8. related to Fig. 5. Identification of a unique cluster within the “mixed immune cell”**

1340 **cluster that corresponds to dendritic cells.**

1341 **A**, Scatter plot comparing gene expression fold-changes from T-cell vs. mixed immune cell cluster  
1342 (x-axis) against fold-changes from Microglia vs. mixed immune cell clusters, as identified in Fig.  
1343 5A. Genes called as significantly differentially expressed ( $FDR < 0.05$ ,  $\text{Log}_2(\text{fold-change}) > 1$  or  
1344  $< -1$ ) are colored in red (T-cell vs. mixed immune cell), green (Microglia vs. mixed immune cell)  
1345 or blue (both contrasts). X and Y axes represent gene expression on a log<sub>2</sub> scale  
1346 ( $\text{log}_2(\text{normCount}+1)$ ). Genes significantly enriched in mixed immune cell versus both microglia  
1347 and T-cell populations are labeled, and these are potential candidate markers for a unique sub-  
1348 population of the mixed immune cell that are distinct from microglia and T cells. **B**, tSNE  
1349 dimensional reduction of immune cells (n = 59099; microglia n = 54523, T cell n = 2977 and mixed  
1350 immune cells n = 1599), colored by sub-cluster, major cluster from Fig. 5A, or T-cell (Lee *et al.*,  
1351 2021b) or resting microglia (Friedman *et al.*, 2018) gene set scores (gene sets in Supplementary  
1352 Table S1). Of note, C18 are microglia and T cell doublets. **C**, Dot plot showing the expression of  
1353 potential candidate markers for the unique mixed immune subpopulation (as labelled in **(A)**) that  
1354 are also identified as potential markers for immune cells sub-cluster C21 using FindMarkers  
1355 function from Seurat package (Stuart *et al.*, 2019). **D**, Heatmap showing prediction scores for  
1356 immune cells subclusters using SingleR and ImmGen dataset main labels (Heng *et al.*, 2008) from  
1357 the celldex package (Aran *et al.*, 2019). This analysis indicates the unique cell population in C21  
1358 most strongly corresponds to dendritic cells (DC). **E**, tSNE plot of genes marking C21 (dendritic)  
1359 population using potential markers from **(A)**.

1360

1361

1362

1363

1364 Fig. S9

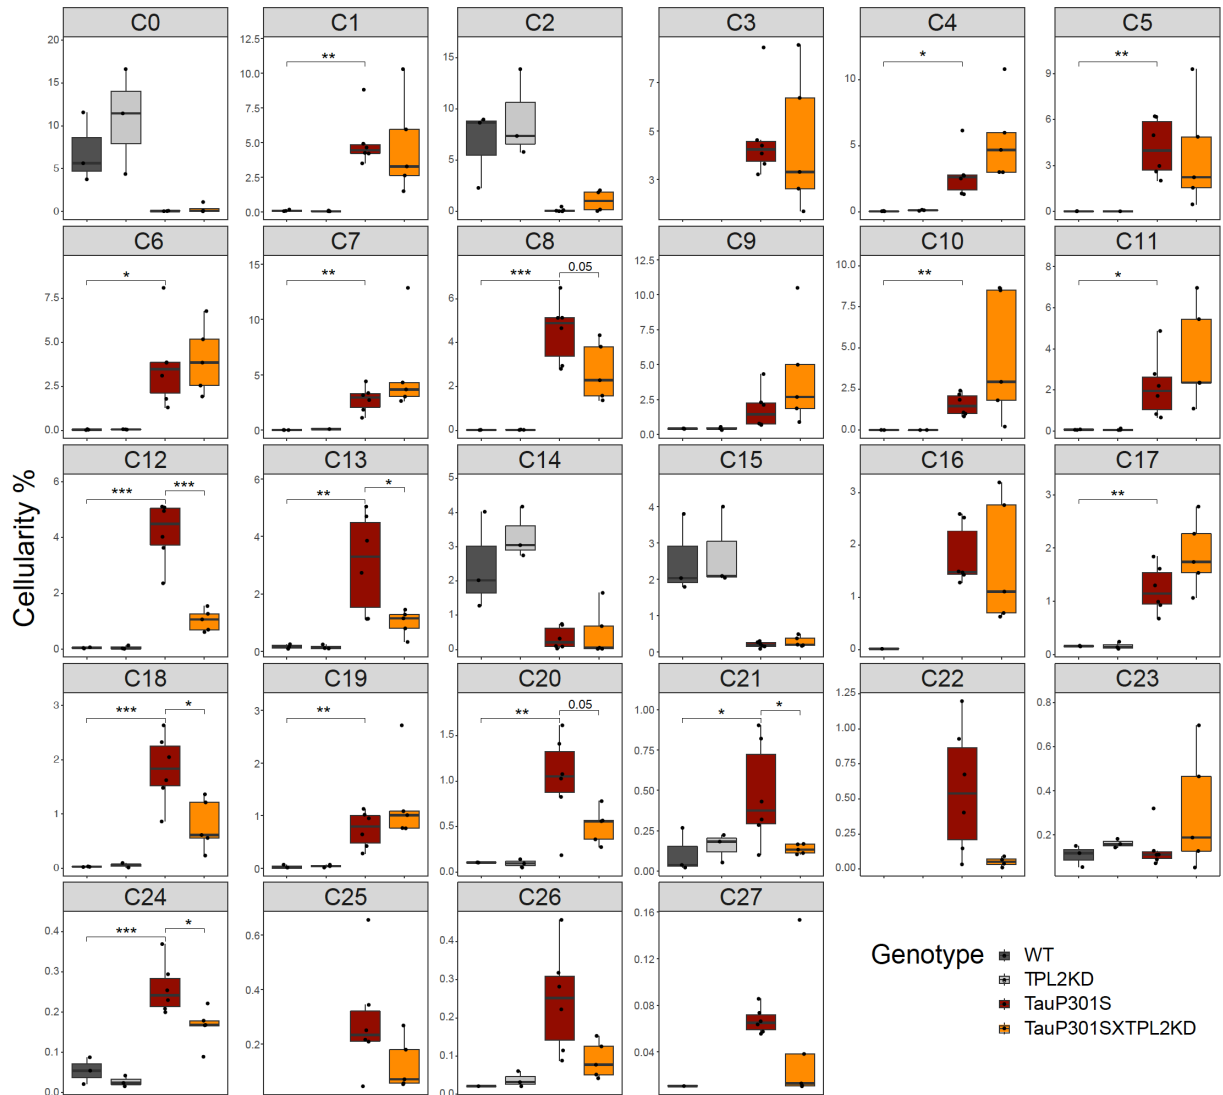

1373 Fig. S10

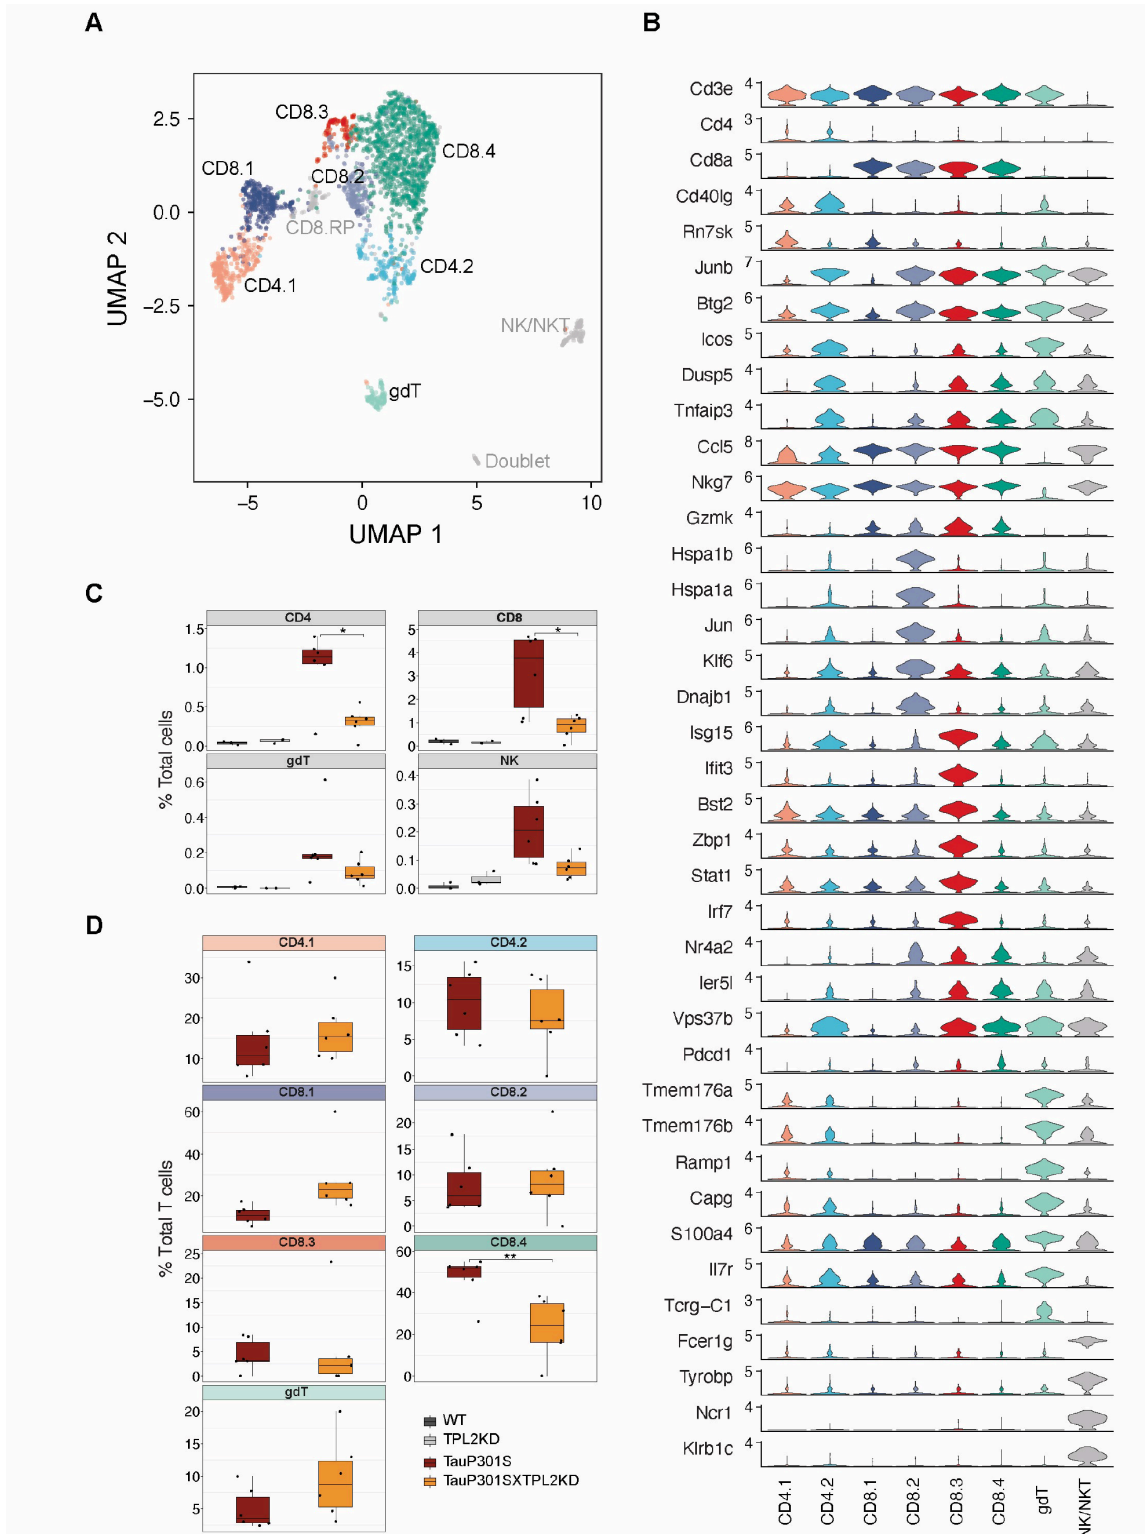

1374

1375

1376 **Fig. S10. Sub-clustering of T cells, related to Fig. 5.**

1377 **A**, UMAP dimensionality reduction and subclustering of 2,977 T cells defined from Figure 5A,  
1378 colored by cell type interpretation. gdT = Gammadelta T cell, NK = Natural killer, RP = Ribosomal  
1379 protein. **B**, Violin plots showing the log<sub>2</sub> normalized expression of select genes representative for  
1380 cell types identified in **(A)**. **(C-D)** Cellularity plot, similar to Figure 5C, showing for each sample  
1381 the percentage of T cell subtypes as a percentage of the total number of cells **(C)** or the total number  
1382 of T cells **(D)** in that sample. P values are based on pairwise t-test with *Benjamini Hochberg*  
1383 correction for multiple comparisons in **(c)** or t-test in **(D)**. \*, p < 0.05, \*\*, p < 0.01.

1384

1385

1386

1387

1388

1389

1390

1391

1392

1393

1394

1395

1396

1397

1398

1399



1400 Fig. S11

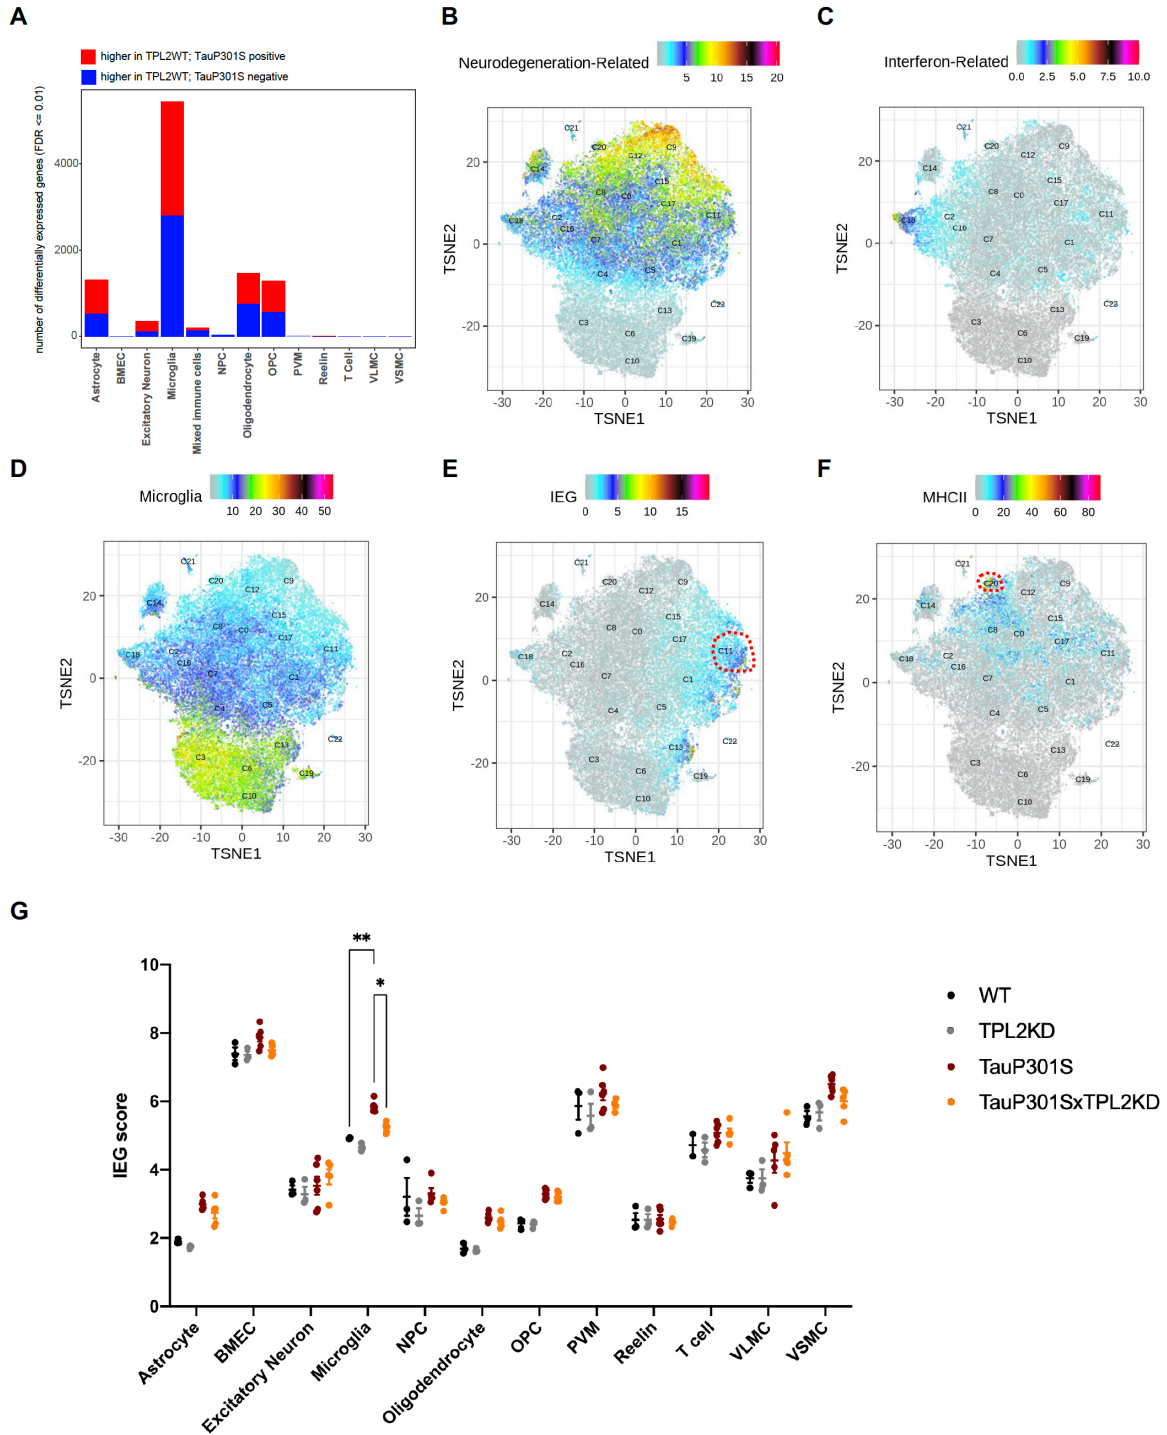

1401

1402

1403

1404 **Fig. S11. Related to Fig. 6. Sub-clustering of microglia and interpretation of cell activation**

1405 **states by gene set scores.**

1406 **A**, Number of significantly differentially expressed genes (DEGs) for each cell type from  
1407 pseudobulk analysis at FDR < 0.01 and Log2(fold-change) > 1.5 or < -1.5 between TauP301S  
1408 positive and non-transgenic samples (TauP301S negative) across cell types from Fig. 5A. **B-F**,  
1409 tSNE dimensional reduction of microglia cells (n = 54,523) colored by average/combinatorial  
1410 expression of genes belonging to the indicated sets (DAM, IFN, Resting MG, IEG and MHCII).  
1411 All gene sets used in this study are provided in Table\_S1. **G**, Strip plot showing expression levels  
1412 of IEG gene sets in each of the 4 genotypes in this study across all cell types from Fig. 5A. Data  
1413 are represented by mean +/- SEM. \*, p < 0.05, \*\*, p < 0.01, \*\*\*, p < 0.001, Two-way ANOVA  
1414 with Tukey's multiple comparisons test.

1415

1416

1417

1418

1419

1420

1421

1422

1423

1424

1425

1426

1427

1428 Fig. S12

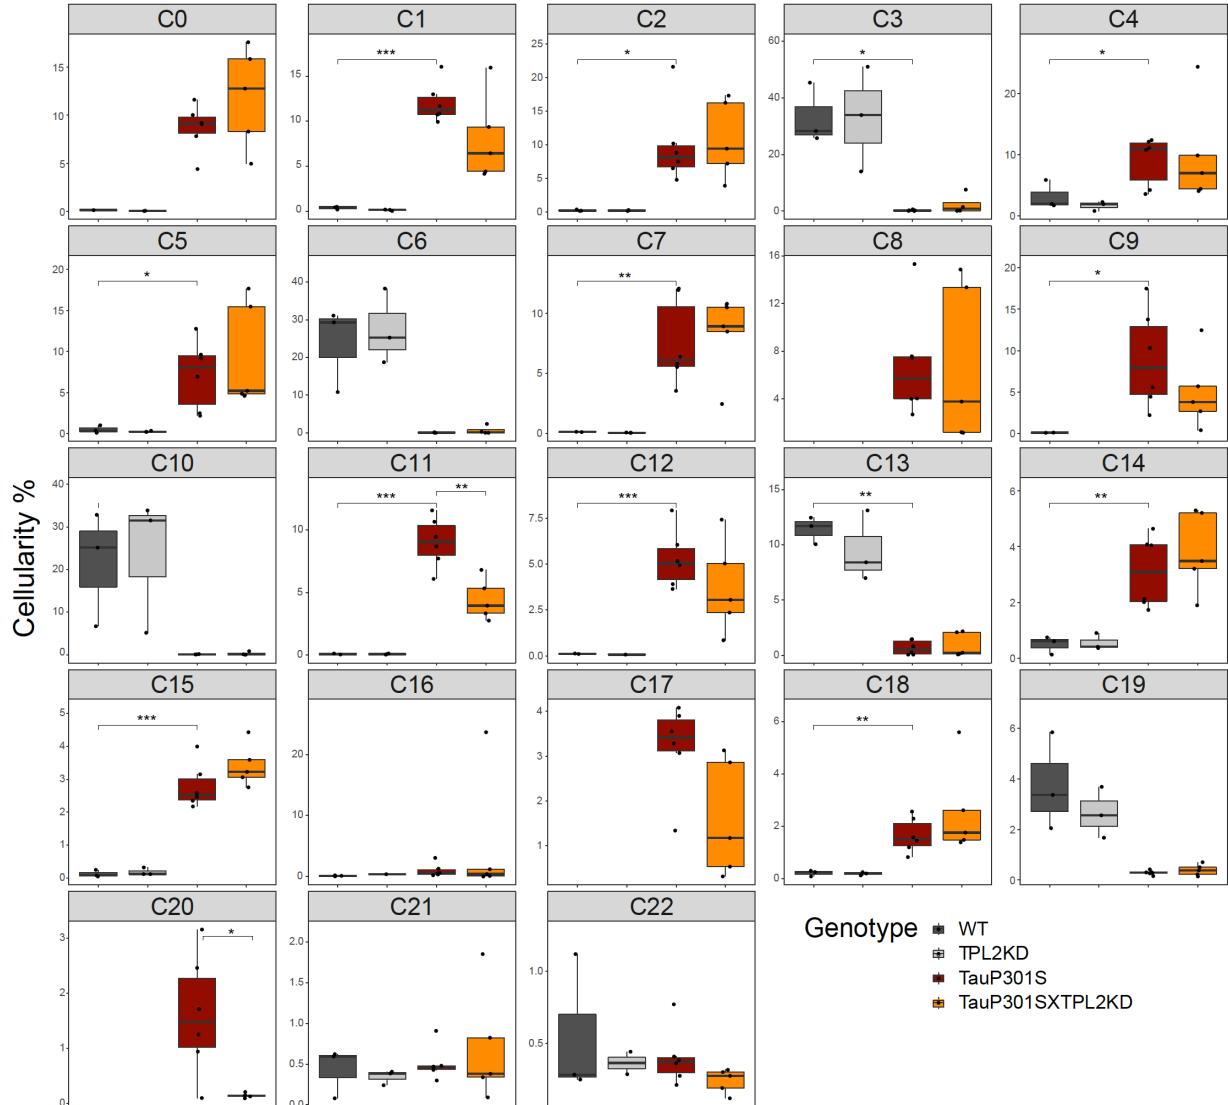

1429

1430

1431 **Fig. S12. Cellularity plot for microglia cells.**

1432 similar to Fig. 5C, illustrating proportions of each microglia subcluster as a percentage of total

1433 microglia cells within each sample (each dot is a sample). P values are based on t-test between

1434 indicated groups. \*, p < 0.05, \*\*, p < 0.01, \*\*\*, p < 0.001.

1435
